# Supplementary material for: Dehydrogenative alkenylation of uracils via palladium-catalyzed regioselective C–H activation
Source: Royal Society of Chemistry journal article supplement (doi:10.1039/c3cc41130c), 2013-01-01

## SUPPORTING INFORMATION

for

### **Dehydrogenative alkenylation of uracils *via* palladium-catalyzed regioselective C–H activation**

Yi-Yun Yu and Gunda I. Georg\*

*Department of Chemistry and Department of Medicinal Chemistry and  
the Institute for Therapeutics Discovery and Development, University of Minnesota  
717 Delaware Street SE, Minneapolis, Minnesota 55414 USA*

#### **Table of Contents**

|                                                                                  |         |
|----------------------------------------------------------------------------------|---------|
| 1. General experimental remarks                                                  | S2      |
| 2. General procedure for the dehydrogenative alkenylation reactions              | S2      |
| 3. Detailed optimization study                                                   | S3–S6   |
| 4. Characterization data for compounds <b>3a–3t</b>                              | S7–S14  |
| 5. <sup>1</sup> H NMR and <sup>13</sup> C NMR spectra for compounds <b>3a–3t</b> | S15–S35 |

## 1. General experimental remarks

All reactions were carried out in clear 1-dram vials under air. Vials were used without drying. Palladium(II) acetate, the alkenes, all other chemicals and solvents were purchased and were directly used without further purification. Flash column chromatography was carried out on silica gel. TLC was conducted on 250 micron, F<sub>254</sub> silica gel plates. <sup>1</sup>H NMR analyses were performed on a 400 MHz spectrometer and <sup>13</sup>C NMR spectra were recorded on a 100 MHz spectrometer with complete proton decoupling. Chemical shifts were reported as ppm relative to chloroform (CHCl<sub>3</sub>: 7.26 ppm for <sup>1</sup>H, 77.16 ppm for <sup>13</sup>C). Data are reported as follows: chemical shift, multiplicity (s = singlet, d = doublet, t = triplet, q = quartet, br = broad, m = multiplet), coupling constants (Hz) and integration. IR spectra of solids were obtained by dissolving the sample in CH<sub>2</sub>Cl<sub>2</sub> and letting the solvent evaporate on a NaCl plate. High-resolution mass spectrometry was performed on an ESI-TOF instrument. Melting points were uncorrected.

## 2. General Procedure for the dehydrogenative alkenylation reactions

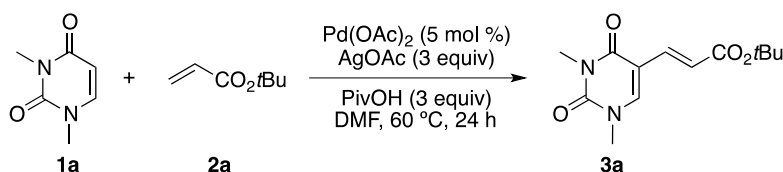

1,3-Dimethyluracil (**1**) (14.0 mg, 0.1 mmol) was mixed in a clear 1-dram vial with Pd(OAc)<sub>2</sub> (1.13 mg, 0.005 mmol), AgOAc (50.3 mg, 0.3 mmol), PivOH (30.6 mg, 0.3 mmol). To the mixture was added *tert*-butyl acrylate (**2a**) (29.3 μL, 0.2 mmol), followed by DMF (0.5 mL). The reaction vessel was then capped. After being stirred for 2 min, the reaction was heated at 60 °C for 24 h in dark. The reaction was then cooled, diluted with EtOAc (1 mL), and pressure-filtered over Celite. The filter cake was washed with EtOAc (20 mL). The filtrate was then concentrated under reduced pressure and purified by flash chromatography (30–40% EtOAc in hexanes) on silica gel to provide 24.3 mg (92%) of **3a** as an off-white solid (mp 140–142 °C). <sup>1</sup>H NMR (400 MHz, CDCl<sub>3</sub>) δ 7.37 (s, 1H), 7.19 (d, *J* = 15.8 Hz, 1H), 6.89 (d, *J* = 16.6 Hz, 1H), 3.47 (s, 3H), 3.38 (s, 3H), 1.49 (s, 9H); <sup>13</sup>C NMR (100 MHz, CDCl<sub>3</sub>) δ 166.9, 161.5, 150.9, 144.2, 135.1, 121.4, 109.3, 80.5, 37.6, 28.3, 28.3; FTIR (NaCl, cm<sup>-1</sup>) 3155, 2953, 1710, 1665, 1629, 1457, 1437, 1370, 1301, 1263, 1194, 1172, 1091, 984, 907; HRMS (ESI+) *m/e* calculated for [M+Na]<sup>+</sup> C<sub>13</sub>H<sub>18</sub>N<sub>2</sub>O<sub>4</sub>Na: 289.1159, found 289.1158.

### 3. Detailed optimization study

#### 3.1 Reoxidant screening

**Table S1** Reoxidant effect on the dehydrogenative alkenylation

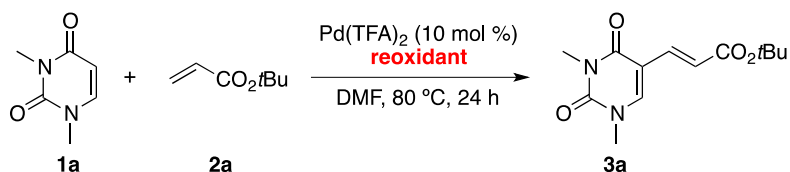

| Entry <sup>a</sup> | Reoxidant (equiv.)                    | Conversion (%) <sup>b</sup> | Yield (%) <sup>c</sup> |
|--------------------|---------------------------------------|-----------------------------|------------------------|
| 1                  | Cu(OAc) <sub>2</sub> (2.0)            | 74                          | 52                     |
| 2                  | CuCl <sub>2</sub> (2.0)               | 9                           | 0                      |
| 3                  | Cu(OTf) <sub>2</sub> (2.0)            | 8                           | 6                      |
| 4                  | Cu(TFA) <sub>2</sub> (2.0)            | 10                          | 0                      |
| 5                  | duroquinone (2.0)                     | 15                          | 4                      |
| 6                  | PhCO <sub>3</sub> tBu (2.0)           | 60                          | 45                     |
| 7                  | Ag <sub>2</sub> O (1.0)               | 26                          | 11                     |
| 8                  | Ag <sub>2</sub> CO <sub>3</sub> (1.0) | 37                          | 20                     |
| 9                  | AgF <sub>2</sub> (2.0)                | -1                          | 0                      |
| 10                 | AgCl (2.0)                            | 7                           | 0                      |
| 11                 | AgNO <sub>3</sub> (2.0)               | 10                          | 3                      |
| 12                 | AgSbF <sub>6</sub> (2.0)              | 32                          | 0                      |
| 13                 | AgOBz (2.0)                           | 64                          | 55                     |
| 14                 | AgOTf (2.0)                           | 27                          | 0                      |
| <b>15</b>          | <b>AgOAc (2.0)</b>                    | <b>86</b>                   | <b>68</b>              |

<sup>a</sup> Reaction conditions: uracil **1a** (0.2 M), acrylate **2a** (2.0 equiv.), Pd(TFA)<sub>2</sub> (10 mol%), oxidant, DMF (0.5 mL) under air at 80 °C, 24 h. <sup>b</sup> <sup>1</sup>H NMR % conversion of the starting enaminone with Ph<sub>3</sub>SiMe (1.0 equiv) as the internal standard. <sup>c</sup> <sup>1</sup>H NMR % yield with Ph<sub>3</sub>SiMe (1.0 equiv) as the internal standard.

#### 3.2 Additive study

**Table S2** Additive effect on the dehydrogenative alkenylation

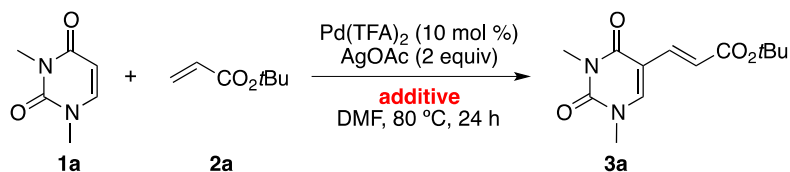

| Entry <sup>a</sup> | Reoxidant (equiv.)      | Additive (equiv.)                    | Conversion (%) <sup>b</sup> | Yield (%) <sup>c</sup> |
|--------------------|-------------------------|--------------------------------------|-----------------------------|------------------------|
| 1                  | AgOAc (2.0)             | K <sub>2</sub> CO <sub>3</sub> (2.0) | 37                          | 19                     |
| 2                  | AgOAc (2.0)             | TFA (2.0)                            | 34                          | 24                     |
| 3                  | AgOAc (2.0)             | AcOH (2.0)                           | 86                          | 70                     |
| <b>4</b>           | <b>AgOAc (2.0)</b>      | <b>PivOH (2.0)</b>                   | <b>96</b>                   | <b>77</b>              |
| 5                  | Ag <sub>2</sub> O (1.0) | PivOH (2.0)                          | 88                          | 74                     |
| 6                  | AgOAc (2.0)             | --                                   | 86                          | 68                     |

<sup>a</sup> Reaction conditions: uracil **1a** (0.2 M), acrylate **2a** (2.0 equiv.), Pd(TFA)<sub>2</sub> (10 mol%), AgOAc (2.0 equiv.), additive, DMF (0.5 mL) under air at 80 °C, 24 h. <sup>b</sup> <sup>1</sup>H NMR % conversion of the starting enaminone with Ph<sub>3</sub>SiMe (1.0 equiv) as the internal standard. <sup>c</sup> <sup>1</sup>H NMR % yield with Ph<sub>3</sub>SiMe (1.0 equiv) as the internal standard.

### 3.3 Solvent effect

**Table S3** Solvent effect on the dehydrogenative alkenylation

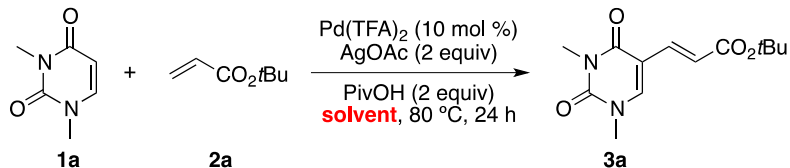

| Entry <sup>a</sup> | Solvent (0.5 mL) | Conversion (%) <sup>b</sup> | Yield (%) <sup>c</sup> |
|--------------------|------------------|-----------------------------|------------------------|
| 1                  | DMSO             | 38                          | 24                     |
| 2                  | MeCN             | 76                          | 62                     |
| 3                  | NMP              | 92                          | 64                     |
| <b>4</b>           | <b>DMF</b>       | <b>96</b>                   | <b>77</b>              |
| 5                  | THF              | 94                          | 66                     |
| 6                  | dioxane          | 100                         | 58                     |
| 7                  | <i>t</i> BuOH    | 78                          | 52                     |
| 8                  | DMA              | 90                          | 72                     |

<sup>a</sup> Reaction conditions: uracil **1a** (0.2 M), acrylate **2a** (2.0 equiv.), Pd(TFA)<sub>2</sub> (10 mol%), AgOAc (2.0 equiv.), PivOH (3.0 equiv.), solvent, under air at 80 °C, 24 h. <sup>b</sup> <sup>1</sup>H NMR % conversion of the starting enaminone with Ph<sub>3</sub>SiMe (1.0 equiv) as the internal standard. <sup>c</sup> <sup>1</sup>H NMR % yield with Ph<sub>3</sub>SiMe (1.0 equiv) as the internal standard.

### 3.4 Catalyst choice

**Table S4** Catalyst efficiency on the dehydrogenative alkenylation

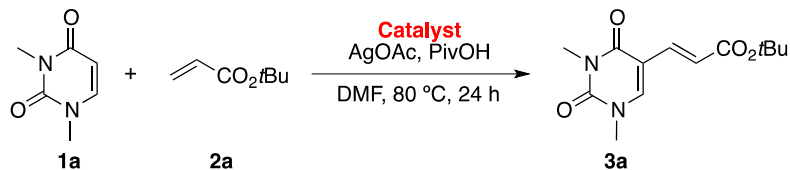

| Entry <sup>a</sup> | Catalyst (mol%)                | AgOAc (equiv.) | PivOH (equiv.) | Conversion (%) <sup>b</sup> | Yield (%) <sup>c</sup> |
|--------------------|--------------------------------|----------------|----------------|-----------------------------|------------------------|
| 1                  | Pd(TFA) <sub>2</sub> (10)      | 2.0            | 2.0            | 86                          | 68                     |
| 2                  | Pd(OAc) <sub>2</sub> (10)      | 1.1            | 2.0            | 76                          | 58                     |
| 3                  | Pd(OAc) <sub>2</sub> (10)      | 2.0            | 2.0            | 95                          | 80                     |
| 4                  | Pd(OAc) <sub>2</sub> (10)      | 2.5            | 2.0            | 100                         | 85                     |
| 5                  | Pd(OAc) <sub>2</sub> (10)      | 3.0            | 2.0            | 100                         | 85                     |
| 6                  | Pd(OAc) <sub>2</sub> (1)       | 2.5            | 2.0            | 73                          | 66                     |
| 7                  | Pd(OAc) <sub>2</sub> (1)       | 4.0            | 2.0            | 65                          | 57                     |
| 8                  | Pd(OAc) <sub>2</sub> (5)       | 1.5            | 2.0            | 79                          | 67                     |
| 9                  | Pd(OAc) <sub>2</sub> (5)       | 2.0            | 2.0            | 93                          | 83                     |
| <b>10</b>          | <b>Pd(OAc)<sub>2</sub> (5)</b> | <b>2.5</b>     | <b>2.0</b>     | <b>100</b>                  | <b>84</b>              |
| 11                 | Pd(OAc) <sub>2</sub> (5)       | 3.0            | 2.0            | 100                         | 82                     |
| 12                 | Pd(OAc) <sub>2</sub> (5)       | 2.5            | 0.5            | 94                          | 79                     |
| 13                 | Pd(OAc) <sub>2</sub> (5)       | 2.5            | 2.5            | 100                         | 83                     |
| 14                 | Pd(OAc) <sub>2</sub> (5)       | 2.5            | 3.0            | 100                         | 83                     |

<sup>a</sup> Reaction conditions: uracil **1a** (0.2 M), acrylate **2a** (2.0 equiv.), catalyst, AgOAc, PivOH, DMF (0.5 mL) under air at 80 °C, 24 h. <sup>b</sup> <sup>1</sup>H NMR % conversion of the starting enaminone with Ph<sub>3</sub>SiMe (1.0 equiv) as the internal standard. <sup>c</sup> <sup>1</sup>H NMR % yield with Ph<sub>3</sub>SiMe (1.0 equiv) as the internal standard.

### 3.5 Reaction scale

**Table S5** Reaction scale of the dehydrogenative alkenylation

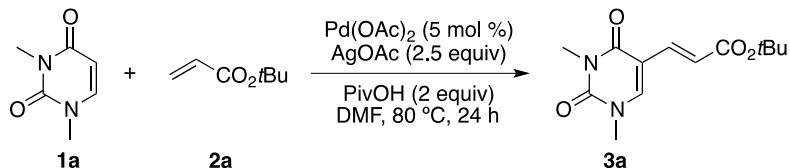

| Entry <sup>a</sup> | <b>1a</b> (M) | <b>2a</b> (equiv.) | Conversion (%) <sup>b</sup> | Yield (%) <sup>c</sup> |
|--------------------|---------------|--------------------|-----------------------------|------------------------|
| 1                  | 0.2           | 1.1                | 100                         | 78                     |
| 2                  | <b>0.2</b>    | <b>2.0</b>         | <b>100</b>                  | <b>84</b>              |
| 3                  | 0.2           | 3.0                | 97                          | 81                     |
| 4                  | 0.1           | 2.0                | 100                         | 84                     |
| 5                  | 0.5           | 2.0                | 100                         | 82                     |

<sup>a</sup> Reaction conditions: uracil **1a** (0.1 mmol), acrylate **2a** (2.0 equiv.), Pd(OAc)<sub>2</sub> (5 mol%), AgOAc (2.5 equiv.), PivOH (2.0 equiv.), DMF (0.2–1.0 mL) under air at 80 °C, 24 h. <sup>b</sup> <sup>1</sup>H NMR % conversion of the starting enaminone with Ph<sub>3</sub>SiMe (1.0 equiv) as the internal standard. <sup>c</sup> <sup>1</sup>H NMR % yield with Ph<sub>3</sub>SiMe (1.0 equiv) as the internal standard.

### 3.6 Temperature effect

**Table S6** Temperature effect on the dehydrogenative alkenylation

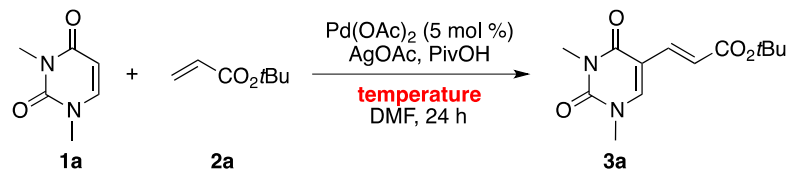

| Entry <sup>a</sup> | AgOAc (equiv.) | PivOH (equiv.) | Temp (°C) | Conversion (%) <sup>b</sup> | Yield (%) <sup>c</sup> |
|--------------------|----------------|----------------|-----------|-----------------------------|------------------------|
| 1                  | 2.5            | 2.0            | 50        | 86                          | 80                     |
| 2                  | 2.5            | 2.0            | 50        | 86                          | 78                     |
| 3                  | 3.0            | 3.0            | 50        | 92                          | 87                     |
| 4                  | 2.5            | 2.0            | 60        | 100                         | 86                     |
| 5                  | 3.0            | 2.0            | 60        | 100                         | 91                     |
| 6                  | 2.5            | 2.5            | 60        | 100                         | 87                     |
| 7                  | 2.5            | 3.0            | 60        | 100                         | 91                     |
| 8                  | <b>3.0</b>     | <b>3.0</b>     | <b>60</b> | <b>100</b>                  | <b>91</b>              |
| 9                  | 2.5            | 2.0            | 70        | 100                         | 88                     |
| 10                 | 3.0            | 3.0            | 70        | 100                         | 87                     |
| 11                 | 2.5            | 2.0            | 80        | 100                         | 84                     |
| 12                 | 2.5            | 2.0            | 100       | 100                         | 74                     |

<sup>a</sup> Reaction conditions: uracil **1a** (0.2 M), acrylate **2a** (2.0 equiv.), Pd(OAc)<sub>2</sub> (5 mol%), AgOAc, PivOH, DMF (0.5 mL) under air, 24 h. <sup>b</sup> <sup>1</sup>H NMR % conversion of the starting enaminone with Ph<sub>3</sub>SiMe (1.0 equiv) as the internal standard. <sup>c</sup> <sup>1</sup>H NMR % yield with Ph<sub>3</sub>SiMe (1.0 equiv) as the internal standard.

### 3.7 Reaction time

**Table S7** Effect of reaction time on the dehydrogenative alkenylation

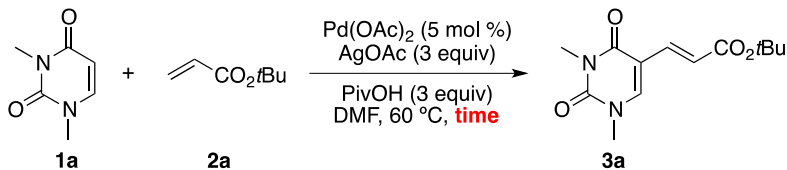

| Entry <sup>a</sup> | Time (h)  | Conversion (%) <sup>b</sup> | Yield (%) <sup>c</sup>    |
|--------------------|-----------|-----------------------------|---------------------------|
| 1                  | 0.5       | 31                          | 25                        |
| 2                  | 1         | 40                          | 37                        |
| 3                  | 2         | 60                          | 53                        |
| 4                  | 4         | 75                          | 66                        |
| 5                  | 8         | 88                          | 81                        |
| 6                  | 12        | 92                          | 88                        |
| 7                  | 18.5      | 100                         | 91                        |
| <b>8</b>           | <b>24</b> | <b>100</b>                  | <b>91(92)<sup>d</sup></b> |

<sup>a</sup> Reaction conditions: uracil **1a** (0.2 M), acrylate **2a** (2.0 equiv.), Pd(OAc)<sub>2</sub> (5 mol%), AgOAc (3.0 equiv.), PivOH (3.0 equiv.), DMF (0.5 mL), under air at 60 °C, 0–24 h. <sup>b</sup> <sup>1</sup>H NMR % conversion of the starting enaminone with Ph<sub>3</sub>SiMe (1.0 equiv) as the internal standard. <sup>c</sup> <sup>1</sup>H NMR % yield with Ph<sub>3</sub>SiMe (1.0 equiv) as the internal standard. <sup>d</sup> Isolated yield in parenthesis.

#### 4. Characterization data for new compounds

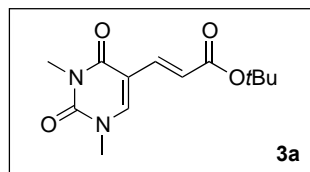

**(E)-1,3-Dimethyl-5-(2'-*t*-butoxycarbonylvinyl)uracil (3a).** **3a** was prepared by the general procedure described above and purified by flash chromatography (30–40% EtOAc in hexanes) on silica gel to provide 24.3 mg (92%) as an off-white solid (mp 140–142 °C).  $^1\text{H}$  NMR (400 MHz,  $\text{CDCl}_3$ )  $\delta$  7.37 (s, 1H), 7.19 (d,  $J$  = 15.8 Hz, 1H), 6.89 (d,  $J$  = 16.6 Hz, 1H), 3.47 (s, 3H), 3.38 (s, 3H), 1.49 (s, 9H);  $^{13}\text{C}$  NMR (100 MHz,  $\text{CDCl}_3$ )  $\delta$  166.9, 161.5, 150.9, 144.2, 135.1, 121.4, 109.3, 80.5, 37.6, 28.3, 28.3; FTIR (NaCl,  $\text{cm}^{-1}$ ) 3155, 2953, 1710, 1665, 1629, 1457, 1437, 1370, 1301, 1263, 1194, 1172, 1091, 984, 907; HRMS (ESI+)  $m/e$  calculated for  $[\text{M}+\text{Na}]^+$   $\text{C}_{13}\text{H}_{18}\text{N}_2\text{O}_4\text{Na}$ : 289.1159, found 289.1158.

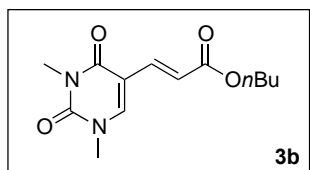

**(E)-1,3-Dimethyl-5-(2'-*n*-butoxycarbonylvinyl)uracil (3b).** **3b** was prepared by the general procedure described above and purified by flash chromatography (40% EtOAc in hexanes) on silica gel to provide 24.1 mg (91%) as a white solid (mp 138–140 °C).  $^1\text{H}$  NMR (400 MHz,  $\text{CDCl}_3$ )  $\delta$  7.41 (s, 1H), 7.28 (d,  $J$  = 16.3 Hz, 1H), 6.99 (d,  $J$  = 15.8 Hz, 1H), 4.16 (t,  $J$  = 6.6 Hz, 2H), 3.47 (s, 3H), 3.38 (s, 3H), 1.65 (m, 2H), 1.41 (m, 2H), 0.94 (t,  $J$  = 7.4 Hz, 3H);  $^{13}\text{C}$  NMR (100 MHz,  $\text{CDCl}_3$ )  $\delta$  167.8, 161.4, 150.8, 144.8, 136.3, 119.3, 109.0, 64.4, 37.6, 30.9, 28.3, 19.3, 13.8; FTIR (NaCl,  $\text{cm}^{-1}$ ) 3055, 2987, 2963, 1708, 1665, 1628, 1454, 1422, 1355, 1299, 1173, 1090, 1063, 985, 867; HRMS (ESI+)  $m/e$  calculated for  $[\text{M}+\text{Na}]^+$   $\text{C}_{13}\text{H}_{18}\text{N}_2\text{O}_4\text{Na}$ : 289.1159, found 289.1159.

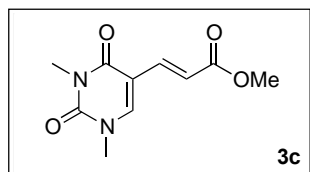

**(E)-5-(2'-Methoxycarbonylvinyl)-1,3-dimethyluracil (3c).** **3c** was prepared by the general procedure described above and purified by flash chromatography (50% EtOAc in hexanes) on silica gel to provide 21.0 mg (94%) as a white solid (mp 163–165 °C).  $^1\text{H}$  NMR (400 MHz,  $\text{CDCl}_3$ )  $\delta$  7.41 (s, 1H), 7.30 (d,  $J$  = 15.8 Hz, 1H), 7.00 (d,  $J$  = 15.8 Hz, 1H), 3.77 (s, 3H), 3.48 (s, 3H), 3.39 (s, 3H);  $^{13}\text{C}$  NMR (100 MHz,  $\text{CDCl}_3$ )  $\delta$  168.2, 161.4, 150.8, 144.9, 136.6, 118.9, 109.0, 51.8, 37.7, 28.3; FTIR (NaCl,  $\text{cm}^{-1}$ ) 3424, 2953, 1710, 1666, 1630, 1456, 1437, 1369, 1301, 1262, 1172, 1091, 984, 908; HRMS (ESI+)  $m/e$  calculated for  $[\text{M}+\text{Na}]^+$   $\text{C}_{10}\text{H}_{12}\text{N}_2\text{O}_4\text{Na}$ : 247.0689, found 247.0695.

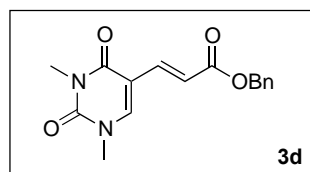

**(E)-5-(2'-Benzoxycarbonylvinyl)-1,3-dimethyluracil (3d).** **3d** was prepared by the general procedure described above and purified by flash chromatography (50% EtOAc in hexanes) on silica gel to provide 15.7 mg (52%) as a white solid (mp 180–182 °C). <sup>1</sup>H NMR (400 MHz, CDCl<sub>3</sub>) δ 7.42–7.30 (m, 7H), 7.06 (d, *J* = 15.7 Hz, 1H), 5.22 (s, 2H), 3.47 (s, 3H), 3.38 (s, 3H); <sup>13</sup>C NMR (100 MHz, CDCl<sub>3</sub>) δ 167.5, 161.4, 150.8, 145.0, 136.9, 136.3, 128.7, 128.3, 128.2, 119.0, 109.0, 66.4, 37.7, 28.3; FTIR (NaCl, cm<sup>-1</sup>) 3367, 2956, 1710, 1666, 1629, 1456, 1380, 1299, 1166, 1093, 985, 907; HRMS (ESI+) *m/e* calculated for [M+Na]<sup>+</sup> C<sub>16</sub>H<sub>16</sub>N<sub>2</sub>O<sub>4</sub>Na: 323.1002, found 323.1003.

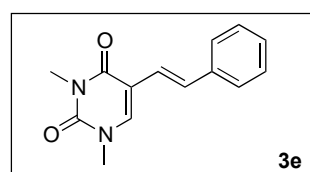

**(E)-1,3-Dimethyl-5-styryluracil (3e).** **3e** was prepared by the general procedure described above and purified by flash chromatography (40% EtOAc in hexanes) on silica gel to provide 24.0 mg (98%) as a yellowish solid (mp 139–141 °C). <sup>1</sup>H NMR (400 MHz, CDCl<sub>3</sub>) δ 7.45 (d, *J* = 7.6 Hz, 2H), 7.38 (d, *J* = 16.4 Hz, 1H), 7.28 (m, 4H), 6.84 (d, *J* = 16.3 Hz, 1H), 3.46 (s, 3H), 3.41 (s, 3H); <sup>13</sup>C NMR (100 MHz, CDCl<sub>3</sub>) δ 162.4, 151.2, 139.4, 137.5, 129.5, 128.8, 127.8, 126.5, 120.1, 111.6, 37.4, 28.3; FTIR (NaCl, cm<sup>-1</sup>) 3055, 2987, 1702, 1659, 1459, 1369, 1087, 968; HRMS (ESI+) *m/e* calculated for [M+Na]<sup>+</sup> C<sub>14</sub>H<sub>14</sub>N<sub>2</sub>O<sub>2</sub>Na: 265.0947, found 265.0943.

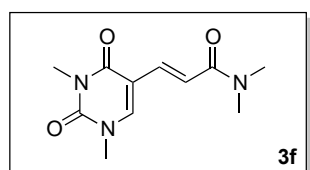

**(E)-1,3-Dimethyl-5-(2'-dimethylcarbamoylvinyl)uracil (3f).** **3f** was prepared by the general procedure described above and purified by flash chromatography (100% acetone) on silica gel to provide 23.5 mg (100%) as a yellowish solid (mp 208–210 °C). <sup>1</sup>H NMR (400 MHz, CDCl<sub>3</sub>) δ 7.58 (d, *J* = 15.0 Hz, 1H), 7.13 (s, 1H), 7.07 (d, *J* = 15.0 Hz, 1H), 3.33 (s, 3H), 3.25 (s, 3H), 3.01 (s, 3H), 2.90 (s, 3H); <sup>13</sup>C NMR (100 MHz, CDCl<sub>3</sub>) δ 167.3, 161.9, 150.8, 145.3, 134.3, 118.8, 109.5, 37.5, 36.0, 28.2; FTIR (NaCl, cm<sup>-1</sup>) 3155, 2929, 1709, 1663, 1599, 1454, 1398, 1354, 1146, 1090, 980, 908; HRMS (ESI+) *m/e* calculated for [M+Na]<sup>+</sup> C<sub>11</sub>H<sub>15</sub>N<sub>3</sub>O<sub>3</sub>Na: 260.1006, found 260.1011.



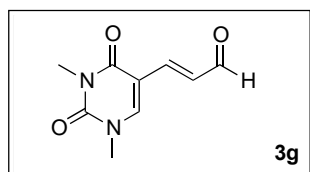

**(E)-5-(2'-Formylvinyl)-1,3-dimethyluracil (3g).** **3g** was prepared by the general procedure described above and purified by flash chromatography (100% EtOAc) on silica gel to provide 15.3 mg (79%) as a white solid (mp 175–177 °C). <sup>1</sup>H NMR (400 MHz, CDCl<sub>3</sub>) δ 9.59 (d, *J* = 7.6 Hz, 1H), 7.57 (s, 1H), 7.23 (d, *J* = 15.9 Hz, 1H), 7.02 (dd, *J* = 15.9, 7.6 Hz, 1H), 3.52 (s, 3H), 3.41 (s, 3H); <sup>13</sup>C NMR (100 MHz, CDCl<sub>3</sub>) δ 193.9, 161.1, 150.8, 144.6, 144.2, 128.5, 108.8, 37.9, 28.4; FTIR (NaCl, cm<sup>-1</sup>) 3155, 2949, 2847, 1716, 1665, 1630, 1455, 1372, 1127, 1092, 908; HRMS (ESI+) *m/e* calculated for [M+Na]<sup>+</sup> C<sub>9</sub>H<sub>10</sub>N<sub>2</sub>O<sub>3</sub>Na: 217.0584, found 217.0580.

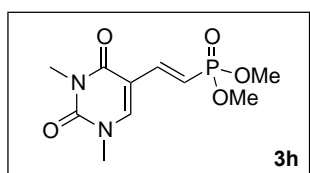

**(E)-5-(2'-Dimethoxyphosphinylvinyl)-1,3-dimethyluracil (3h).** **3h** was prepared by the general procedure described above and purified by flash chromatography (100% acetone) on silica gel to provide 23.0 mg (84%) as a yellow solid (mp 155–157 °C). <sup>1</sup>H NMR (400 MHz, CDCl<sub>3</sub>) δ 7.42 (s, 1H), 7.10 (dd, *J* = 24.1, 17.3 Hz, 1H), 6.91 (dd, *J* = 17.3, 20.1 Hz, 1H), 3.73 (d, *J* = 11.1 Hz, 6H), 3.47 (s, 3H), 3.36 (s, 3H); <sup>13</sup>C NMR (100 MHz, CDCl<sub>3</sub>) δ 161.6, 150.7, 145.6, 141.7 (d, *J* = 7.1 Hz), 113.6 (d, *J* = 185.8 Hz), 109.0 (d, *J* = 23.2 Hz), 52.6 (d, *J* = 13.9 Hz), 37.7, 28.2; FTIR (NaCl, cm<sup>-1</sup>) 3055, 2987, 2954, 1711, 1664, 1454, 1422, 1356, 1266, 1196, 1057, 1034, 989, 863, 838; HRMS (ESI+) *m/e* calculated for [M+Na]<sup>+</sup> C<sub>10</sub>H<sub>15</sub>N<sub>2</sub>O<sub>5</sub>PNa: 297.0611, found 297.0607.

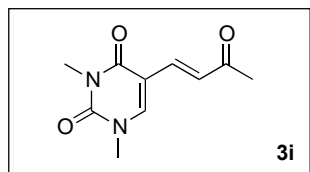

**(E)-1,3-Dimethyl-5-(3'-oxobut-1'-enyl)uracil (3i).** **3i** was prepared by the general procedure described above and purified by flash chromatography (100% EtOAc) on silica gel to provide 15.8 mg (75%) as an off-white solid (mp 164–166 °C). <sup>1</sup>H NMR (400 MHz, CDCl<sub>3</sub>) δ 7.48 (s, 1H), 7.22 (s, 2H), 3.49 (s, 3H), 3.39 (s, 3H), 2.31 (s, 3H); <sup>13</sup>C NMR (100 MHz, CDCl<sub>3</sub>) δ 198.6, 161.6, 150.8, 145.0, 134.7, 126.7, 109.0, 37.8, 28.9, 28.3; FTIR (NaCl, cm<sup>-1</sup>) 3155, 2980, 2938, 2834, 1727, 1703, 1676, 1634, 1456, 1393, 1368, 1318, 1288, 1155, 1100, 1057, 983, 908, 870; HRMS (ESI+) *m/e* calculated for [M+Na]<sup>+</sup> C<sub>10</sub>H<sub>12</sub>N<sub>2</sub>O<sub>3</sub>Na: 231.0740, found 231.0742.

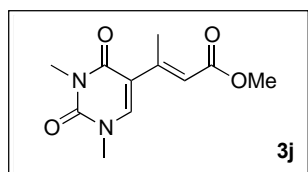

**(E)-5-(2'-Methoxycarbonyl-1'-methylvinyl)-1,3-dimethyluracil (3j).** **3j** was prepared by the general procedure described above and purified by flash chromatography (40% EtOAc in hexanes) on silica gel to provide 13.9 mg (59%) as a white solid (mp 108–110 °C).  $^1\text{H}$  NMR (400 MHz,  $\text{CDCl}_3$ )  $\delta$  7.28 (s, 1H), 6.39 (s, 1H), 3.72 (s, 3H), 3.45 (s, 3H), 3.36 (s, 3H), 2.43 (s, 3H);  $^{13}\text{C}$  NMR (100 MHz,  $\text{CDCl}_3$ )  $\delta$  167.2, 161.5, 151.2, 148.5, 141.1, 118.8, 115.5, 51.4, 37.5, 28.3, 17.7; FTIR (NaCl,  $\text{cm}^{-1}$ ) 3208, 2951, 1702, 1655, 1450, 1363, 1341, 1291, 1214, 1175, 1040; HRMS (ESI+)  $m/e$  calculated for  $[\text{M}+\text{Na}]^+$   $\text{C}_{11}\text{H}_{14}\text{N}_2\text{O}_4\text{Na}$ : 261.0846, found 261.0852.

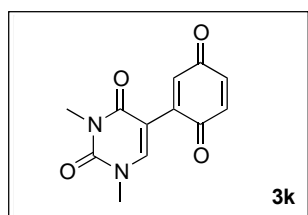

**1,3-Dimethyl-5-p-quinonyluracil (3k).** **3k** was prepared by the general procedure described above and purified by flash chromatography (50% EtOAc in hexanes) on silica gel to provide 13.7 mg (56%) as an orange solid (mp 159–161 °C).  $^1\text{H}$  NMR (400 MHz,  $\text{CDCl}_3$ )  $\delta$  7.84 (s, 1H), 7.46 (d,  $J = 2.1$  Hz, 1H), 6.83–6.76 (m, 2H), 3.51 (s, 3H), 3.40 (s, 3H);  $^{13}\text{C}$  NMR (100 MHz,  $\text{CDCl}_3$ )  $\delta$  187.4, 186.7, 161.4, 150.7, 146.2, 137.0, 136.9, 136.6, 134.1, 104.3, 38.0, 28.6; FTIR (NaCl,  $\text{cm}^{-1}$ ) 3055, 2087, 1710, 1655, 1422, 1357, 1109, 996; HRMS (ESI+)  $m/e$  calculated for  $[\text{M}+\text{Na}]^+$   $\text{C}_{12}\text{H}_{10}\text{N}_2\text{O}_4\text{Na}$ : 269.0533, found 269.0536.

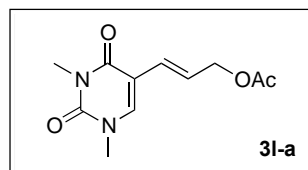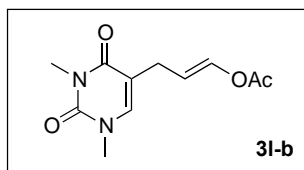

**(E)-5-(3'-Acetoxyprop-1'-enyl)-1,3-dimethyluracil (3l-a)** and **(E)-5-(3'-acetoxyprop-2'-enyl)-1,3-dimethyluracil (3l-b).** **3l-a** and **3l-b** were prepared by the general procedure described above and purified by flash chromatography (60% EtOAc in hexanes) on silica gel to provide 12.5 mg (53%) of an inseparable mixture as a white solid (mp 108–110 °C).  $^1\text{H}$  NMR (400 MHz,  $\text{CDCl}_3$ )  $\delta$  7.27 (s, 1H, **3l-b**), 7.22 (s, 1H, **3l-a**), 6.58 (dt,  $J = 15.8, 6.3$  Hz, 1H, **3l-a**), 6.43 (d,  $J = 12.2$  Hz, 1H, **3l-b**), 6.35 (d,  $J = 15.9$  Hz, 1H, **3l-a**), 5.83 (dt,  $J = 7.0, 11.6$  Hz, 1H, **3l-b**), 4.70 (d,  $J = 7.0$  Hz, 2H, **3l-b**), 4.65 (d,  $J = 6.3$  Hz, 2H, **3l-a**), 3.44 (s, 3H, **3l-b**), 3.43 (s, 3H, **3l-a**), 3.37 (s, 3H, **3l-a**), 3.37 (s, 3H, **3l-b**), 2.08 (s, 3H, **3l-b**), 2.07 (s, 3H, **3l-a**);  $^{13}\text{C}$  NMR (100 MHz,  $\text{CDCl}_3$ )  $\delta$  170.9 (**3l-a**), 162.2 (**3l-a**), 151.2 (**3l-a**), 140.3 (**3l-a**), 125.3 (**3l-a**), 124.6 (**3l-a**), 110.4 (**3l-a**), 65.3 (**3l-a**), 37.3 (**3l-a**), 28.2 (**3l-a**), 21.1 (**3l-a**); FTIR (NaCl,  $\text{cm}^{-1}$ ) 3055, 2087, 1735, 1707, 1655, 1458, 1421, 1369, 1089, 1025, 970; HRMS (ESI+)  $m/e$  calculated for  $[\text{M}+\text{Na}]^+$   $\text{C}_{11}\text{H}_{14}\text{N}_2\text{O}_4\text{Na}$ : 261.0846, found 261.0848.

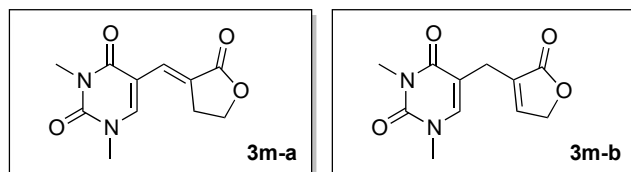

**(E)-1,3-Dimethyl-5-((2-oxodihydrofuran-3(2H)-ylidene)methyl)uracil (3m-a)** and **1,3-dimethyl-5-((2-oxo-2,5-dihydrofuran-3-yl)methyl)uracil (3m-b)**. **3m-a** and **3m-b** were prepared by the general procedure described above and purified by flash chromatography (60% acetone in hexanes) on silica gel to provide 22.4 mg (96%) of an inseparable mixture as a yellow solid (mp 130–132 °C).  $^1\text{H}$  NMR (400 MHz,  $\text{CDCl}_3$ )  $\delta$  7.44 (t,  $J = 2.9$  Hz, 1H, **3m-a**), 7.42 (s, 1H, **3m-a**), 7.36 (s, 1H, **3m-b**), 7.31 (s, 1H, **3m-b**), 4.76 (d,  $J = 1.4$  Hz, 2H, **3m-b**), 4.40 (t,  $J = 7.2$  Hz, 2H, **3m-a**), 3.49 (s, 3H, **3m-a**), 3.38 (s, 3H, **3m-a**), 3.38 (s, 3H, **3m-b**), 3.33 (s, 3H, **3m-b**), 3.31 (s, 2H, **3m-b**), 3.13 (td,  $J = 7.1, 2.7$  Hz, 2H, **3m-a**);  $^{13}\text{C}$  NMR (100 MHz,  $\text{CDCl}_3$ )  $\delta$  174.3 (**3m-b**), 171.9 (**3m-a**), 163.4 (**3m-b**), 161.4 (**3m-a**), 151.7 (**3m-b**), 150.9 (**3m-a**), 147.2 (**3m-b**), 143.8 (**3m-a**), 141.6 (**3m-b**), 130.5 (**3m-b**), 127.9 (**3m-a**), 123.3 (**3m-a**), 109.6 (**3m-a**), 108.8 (**3m-b**), 70.3 (**3m-b**), 65.3 (**3m-a**), 37.9 (**3m-a**), 37.1 (**3m-b**), 28.5 (**3m-a**), 28.2 (**3m-a**), 28.1 (**3m-b**), 23.5 (**3m-b**); FTIR (NaCl,  $\text{cm}^{-1}$ ) 3224, 2930, 1752, 1702, 1664, 1459, 1375, 1343, 1205, 1171, 1081, 1052, 907, 833, 312; HRMS (ESI+)  $m/e$  calculated for  $[\text{M}+\text{Na}]^+ \text{C}_{11}\text{H}_{12}\text{N}_2\text{O}_4\text{Na}$ : 259.0689, found 259.0686.

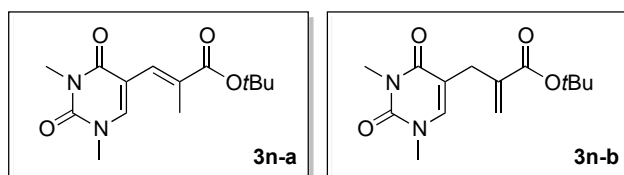

**(E)-1,3-Dimethyl-5-(2'-t-butoxycarbonylpropenyl)uracil (3n-a)** and **1,3-dimethyl-5-(2'-t-butoxycarbonylallyl)uracil (3n-b)**. **3n-a** and **3n-b** were prepared by the general procedure described above and purified by flash chromatography (50% EtOAc in hexanes) on silica gel to provide 13.2 mg (47%) of an inseparable mixture as colorless crystals (mp 93–95 °C).  $^1\text{H}$  NMR (400 MHz,  $\text{CDCl}_3$ )  $\delta$  7.41 (s, 1H, **3n-a**), 7.28 (s, 1H, **3n-a**), 7.10 (s, 1H, **3n-b**), 6.15 (s, 1H, **3n-b**), 5.69 (s, 1H, **3n-b**), 3.46 (s, 3H, **3n-a**), 3.38 (s, 3H, **3n-a**), 3.37 (s, 3H, **3n-b**), 3.35 (s, 3H, **3n-b**), 3.29 (s, 2H, **3n-b**), 1.98 (s, 3H, **3n-a**), 1.51 (s, 9H, **3n-a**), 1.47 (s, 9H, **3n-b**);  $^{13}\text{C}$  NMR (100 MHz,  $\text{CDCl}_3$ )  $\delta$  167.1 (**3n-a**), 166.1 (**3n-b**), 163.5 (**3n-b**), 162.5 (**3n-a**), 151.9 (**3n-b**), 151.2 (**3n-a**), 142.2 (**3n-a**), 140.8 (**3n-b**), 138.6 (**3n-b**), 130.3 (**3n-a**), 128.6 (**3n-a**), 126.7 (**3n-b**), 111.0 (**3n-b**), 110.1 (**3n-a**), 81.1 (**3n-b**), 81.0 (**3n-a**), 37.6 (**3n-a**), 37.0 (**3n-a**, **3n-b**), 29.6 (**3n-a**, **3n-b**), 28.2 (**3n-a**, **3n-b**), 14.9 (**3n-a**); FTIR (NaCl,  $\text{cm}^{-1}$ ) 3055, 2086, 1702, 1660, 1457, 1422, 1369, 1341, 1143, 1085, 1049, 954, 849; HRMS (ESI+)  $m/e$  calculated for  $[\text{M}+\text{Na}]^+ \text{C}_{14}\text{H}_{20}\text{N}_2\text{O}_4\text{Na}$ : 303.1315, found 303.1316.

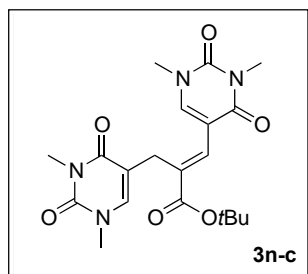

**(E)-1,3-Dimethyl-5-(3'-(1,3-dimethyluracil-5-yl)-2'-*t*-butoxycarbonylallyl)uracil (3n-c).** **3n-c** was prepared by the general procedure described above and purified by flash chromatography (100% EtOAc) on silica gel to provide 6.6 mg (24%) as a white wax.  $^1\text{H}$  NMR (400 MHz,  $\text{CDCl}_3$ )  $\delta$  8.56 (s, 1H), 7.50 (s, 1H), 7.37 (s, 1H), 3.50 (s, 3H), 3.44 (s, 2H), 3.38 (s, 6H), 3.36 (s, 3H), 1.50 (s, 9H);  $^{13}\text{C}$  NMR (100 MHz,  $\text{CDCl}_3$ )  $\delta$  167.4, 164.3, 162.8, 151.6, 151.4, 144.3, 143.1, 131.1, 130.7, 109.6, 108.5, 81.6, 37.6, 37.2, 37.2, 28.3, 25.4; FTIR (NaCl,  $\text{cm}^{-1}$ ) 3054, 2987, 1702, 1659, 1552, 1422, 1370, 1344, 1157, 1102; HRMS (ESI+)  $m/e$  calculated for  $[\text{M}+\text{Na}]^+$   $\text{C}_{20}\text{H}_{26}\text{N}_4\text{O}_6\text{Na}$ : 441.1745, found 441.1751.

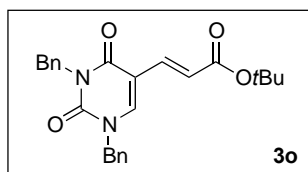

**(E)-1,3-Dibenzyl-5-(2'-*t*-butoxycarbonylvinyl)uracil (3o).** **3o** was prepared by the general procedure described above and purified by flash chromatography (20% EtOAc in hexanes) on silica gel to provide 38.4 mg (94%) as a colorless oil.  $^1\text{H}$  NMR (400 MHz,  $\text{CDCl}_3$ )  $\delta$  7.49 (d,  $J = 6.7$  Hz, 2H), 7.42–7.26 (m, 9H), 7.12 (d,  $J = 15.8$  Hz, 1H), 6.88 (d,  $J = 15.7$  Hz, 1H), 5.18 (s, 2H), 4.97 (s, 2H), 1.47 (s, 9H);  $^{13}\text{C}$  NMR (100 MHz,  $\text{CDCl}_3$ )  $\delta$  166.9, 161.1, 150.8, 143.3, 136.6, 135.2, 134.7, 129.4, 129.3, 129.0, 128.6, 128.4, 127.9, 121.6, 109.9, 80.5, 52.8, 45.0, 28.3; FTIR (NaCl,  $\text{cm}^{-1}$ ) 3055, 2983, 2933, 1708, 1664, 1629, 1496, 1452, 1384, 1368, 1317, 1155, 1080, 1030, 984, 910; HRMS (ESI+)  $m/e$  calculated for  $[\text{M}+\text{Na}]^+$   $\text{C}_{25}\text{H}_{26}\text{N}_2\text{O}_4\text{Na}$ : 441.1785, found 441.1790.

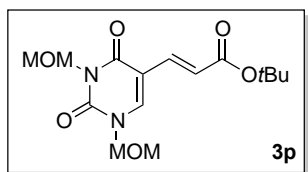

**(E)-1,3-Bis(methoxymethyl)-5-(2'-*t*-butoxycarbonylvinyl)uracil (3p).** **3p** was prepared by the general procedure described above and purified by flash chromatography (50% EtOAc in hexanes) on silica gel to provide 21.7 mg (68%) as a colorless oil.  $^1\text{H}$  NMR (400 MHz,  $\text{CDCl}_3$ )  $\delta$  7.51 (s, 1H), 7.21 (d,  $J = 15.8$  Hz, 1H), 6.88 (d,  $J = 15.8$  Hz, 1H), 5.42 (s, 2H), 5.18 (s, 2H), 3.45 (s, 3H), 3.41 (s, 3H), 1.49 (s, 9H);  $^{13}\text{C}$  NMR (100 MHz,  $\text{CDCl}_3$ )  $\delta$  166.6, 161.1, 150.9, 142.7, 134.7, 122.4, 110.4, 80.6, 79.3, 72.5, 58.2, 57.5, 28.3; FTIR (NaCl,  $\text{cm}^{-1}$ ) 3155, 2980, 2938, 1724, 1676, 1634, 1456, 1368, 1318, 1288, 1155, 1100, 984, 908; HRMS (ESI+)  $m/e$  calculated for  $[\text{M}+\text{Na}]^+$   $\text{C}_{15}\text{H}_{21}\text{N}_2\text{O}_6\text{Na}$ : 349.1370, found 349.1367.

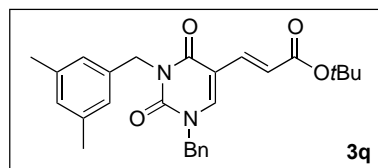

**(E)-1-Benzyl-3-(3',5'-dimethylbenzyl)-5-(2'-t-butoxycarbonylvinyl)uracil (3q).** **3q** was prepared by the general procedure described above and purified by flash chromatography (20% EtOAc in hexanes) on silica gel to provide 33.3 mg (76%) as a colorless oil.  $^1\text{H}$  NMR (400 MHz,  $\text{CDCl}_3$ )  $\delta$  7.40–7.27 (m, 6H), 7.13 (d,  $J$  = 15.8 Hz, 1H), 7.06 (s, 2H), 6.90–6.87 (m, 2H), 5.11 (s, 2H), 4.98 (s, 2H), 2.28 (s, 6H), 1.48 (s, 9H);  $^{13}\text{C}$  NMR (100 MHz,  $\text{CDCl}_3$ )  $\delta$  166.9, 161.0, 150.8, 143.3, 138.1, 136.4, 135.3, 134.8, 129.5, 129.4, 129.0, 128.3, 126.7, 121.5, 109.9, 80.5, 52.8, 44.9, 28.3, 21.4; FTIR (NaCl,  $\text{cm}^{-1}$ ) 3156, 2079, 2948, 2869, 1704, 1660, 1466, 1368, 1329, 1297, 1153, 1116, 1041, 993, 908; HRMS (ESI+)  $m/e$  calculated for  $[\text{M}+\text{Na}]^+$   $\text{C}_{27}\text{H}_{30}\text{N}_2\text{O}_4\text{Na}$ : 469.2098, found 469.2097.

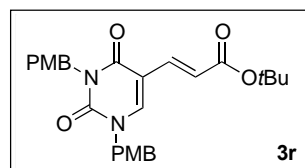

**(E)-1,3-Bis(p-methoxybenzyl)-5-(2'-t-butoxycarbonylvinyl)uracil (3r).** **3r** was prepared by the general procedure described above and purified by flash chromatography (50% EtOAc in hexanes) on silica gel to provide 46.1 mg (96%) as a colorless oil.  $^1\text{H}$  NMR (400 MHz,  $\text{CDCl}_3$ )  $\delta$  7.46 (d,  $J$  = 8.6 Hz, 2H), 7.28 (s, 1H), 7.22 (d,  $J$  = 8.6 Hz, 2H), 7.10 (d,  $J$  = 15.8 Hz, 1H), 6.92–6.80 (m, 5H), 5.10 (s, 2H), 4.88 (s, 2H), 3.81 (s, 3H), 3.77 (s, 3H), 1.47 (s, 9H);  $^{13}\text{C}$  NMR (100 MHz,  $\text{CDCl}_3$ )  $\delta$  166.9, 161.0, 160.1, 159.3, 150.8, 143.1, 135.4, 130.9, 130.1, 128.9, 126.5, 121.3, 114.8, 113.8, 109.7, 80.4, 55.4, 52.3, 44.4, 28.3; FTIR (NaCl,  $\text{cm}^{-1}$ ) 3055, 2987, 2839, 1706, 1663, 1628, 1623, 1514, 1456, 1422, 1368, 1178, 1155, 1034, 985, 896; HRMS (ESI+)  $m/e$  calculated for  $[\text{M}+\text{Na}]^+$   $\text{C}_{27}\text{H}_{30}\text{N}_2\text{O}_6\text{Na}$ : 501.1996, found 501.1995.

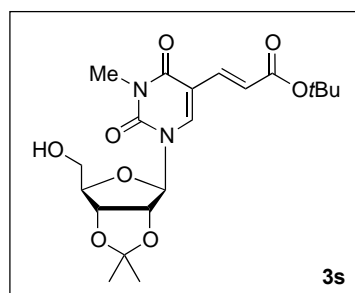

**(E)-2',3'-O-Isopropylidene-3-methyl-5-(2'-t-butoxycarbonylvinyl)uridine (3s).** **3s** was prepared by the general procedure described above and purified by flash chromatography (35% EtOAc in hexanes) on silica gel to provide 27.1 mg (66%) as a white wax.  $^1\text{H}$  NMR (400 MHz,  $\text{CDCl}_3$ )  $\delta$  7.83 (s, 1H), 7.19 (d,  $J$  = 15.8 Hz, 1H), 6.81 (d,  $J$  = 15.8 Hz, 1H), 5.76 (d,  $J$  = 1.4 Hz, 1H), 4.96–4.89 (m, 2H), 4.42–4.34 (m, 1H), 3.96 (dd,  $J$  = 11.8, 2.3 Hz, 1H), 3.83 (dd,  $J$  = 11.8, 2.9 Hz, 1H), 3.34 (s, 3H), 2.95 (br, 1H), 1.58 (s, 3H), 1.48 (s, 9H), 1.35 (s, 3H);  $^{13}\text{C}$  NMR (100 MHz,

CDCl<sub>3</sub>)  $\delta$  167.1, 161.1, 150.1, 141.2, 135.4, 121.3, 114.4, 109.2, 96.0, 87.2, 84.9, 80.7, 62.8, 28.3, 28.1, 27.3, 25.4; FTIR (NaCl, cm<sup>-1</sup>) 3468, 3055, 2987, 1710, 1667, 1627, 1466, 1422, 1369, 1265, 1155, 1112, 1084, 987, 855; HRMS (ESI+)  $m/e$  calculated for [M+Na]<sup>+</sup> C<sub>20</sub>H<sub>28</sub>N<sub>2</sub>O<sub>8</sub>Na: 447.1738, found 447.1737.

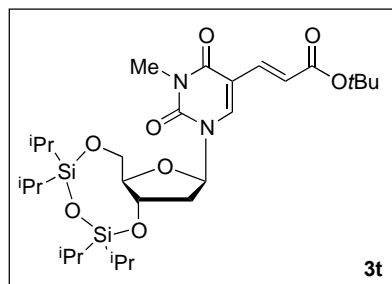

**(*E*)-2'-Deoxy-3',5'-O-(1',1',3',3'-tetraisopropylidisiloxy)-3-methyl-5-(2'-*t*-butoxycarbonylvinyl)uridine (3t).** **3t** was prepared by the general procedure described above and purified by flash chromatography (10–20% EtOAc in hexanes) on silica gel to provide 44.6 mg (75%) as a colorless oil. <sup>1</sup>H NMR (400 MHz, CDCl<sub>3</sub>)  $\delta$  7.94 (s, 1H), 7.26 (d,  $J$  = 15.8 Hz, 1H), 6.84 (d,  $J$  = 15.9 Hz, 1H), 6.02 (d,  $J$  = 6.6 Hz, 1H), 4.44 (q,  $J$  = 8.0 Hz, 1H), 4.16 (d,  $J$  = 13.1 Hz, 1H), 4.03 (dd,  $J$  = 13.2, 2.5 Hz, 1H), 3.81 (d,  $J$  = 8.2 Hz, 1H), 3.35 (s, 3H), 2.54 (ddd,  $J$  = 13.4, 10.2, 7.2 Hz, 1H), 2.29 (dd,  $J$  = 13.4, 7.2 Hz, 1H), 1.48 (s, 9H), 1.11–0.98 (m, 28H); <sup>13</sup>C NMR (100 MHz, CDCl<sub>3</sub>)  $\delta$  166.7, 161.2, 149.9, 138.6, 135.7, 121.1, 108.8, 85.5, 80.2, 67.1, 60.1, 40.2, 28.3, 27.9, 17.5, 17.1, 13.6, 13.1, 12.8, 12.6; FTIR (NaCl, cm<sup>-1</sup>) 3156, 2079, 2948, 2869, 1704, 1660, 1466, 1368, 1320, 1297, 1153, 1116, 1041, 993, 908, 885; HRMS (ESI+)  $m/e$  calculated for [M+Na]<sup>+</sup> C<sub>29</sub>H<sub>50</sub>N<sub>2</sub>O<sub>8</sub>Si<sub>2</sub>Na: 633.3003, found 633.2995.

5.  $^1\text{H}$  NMR and  $^{13}\text{C}$  NMR spectra for compounds **3a–3t**

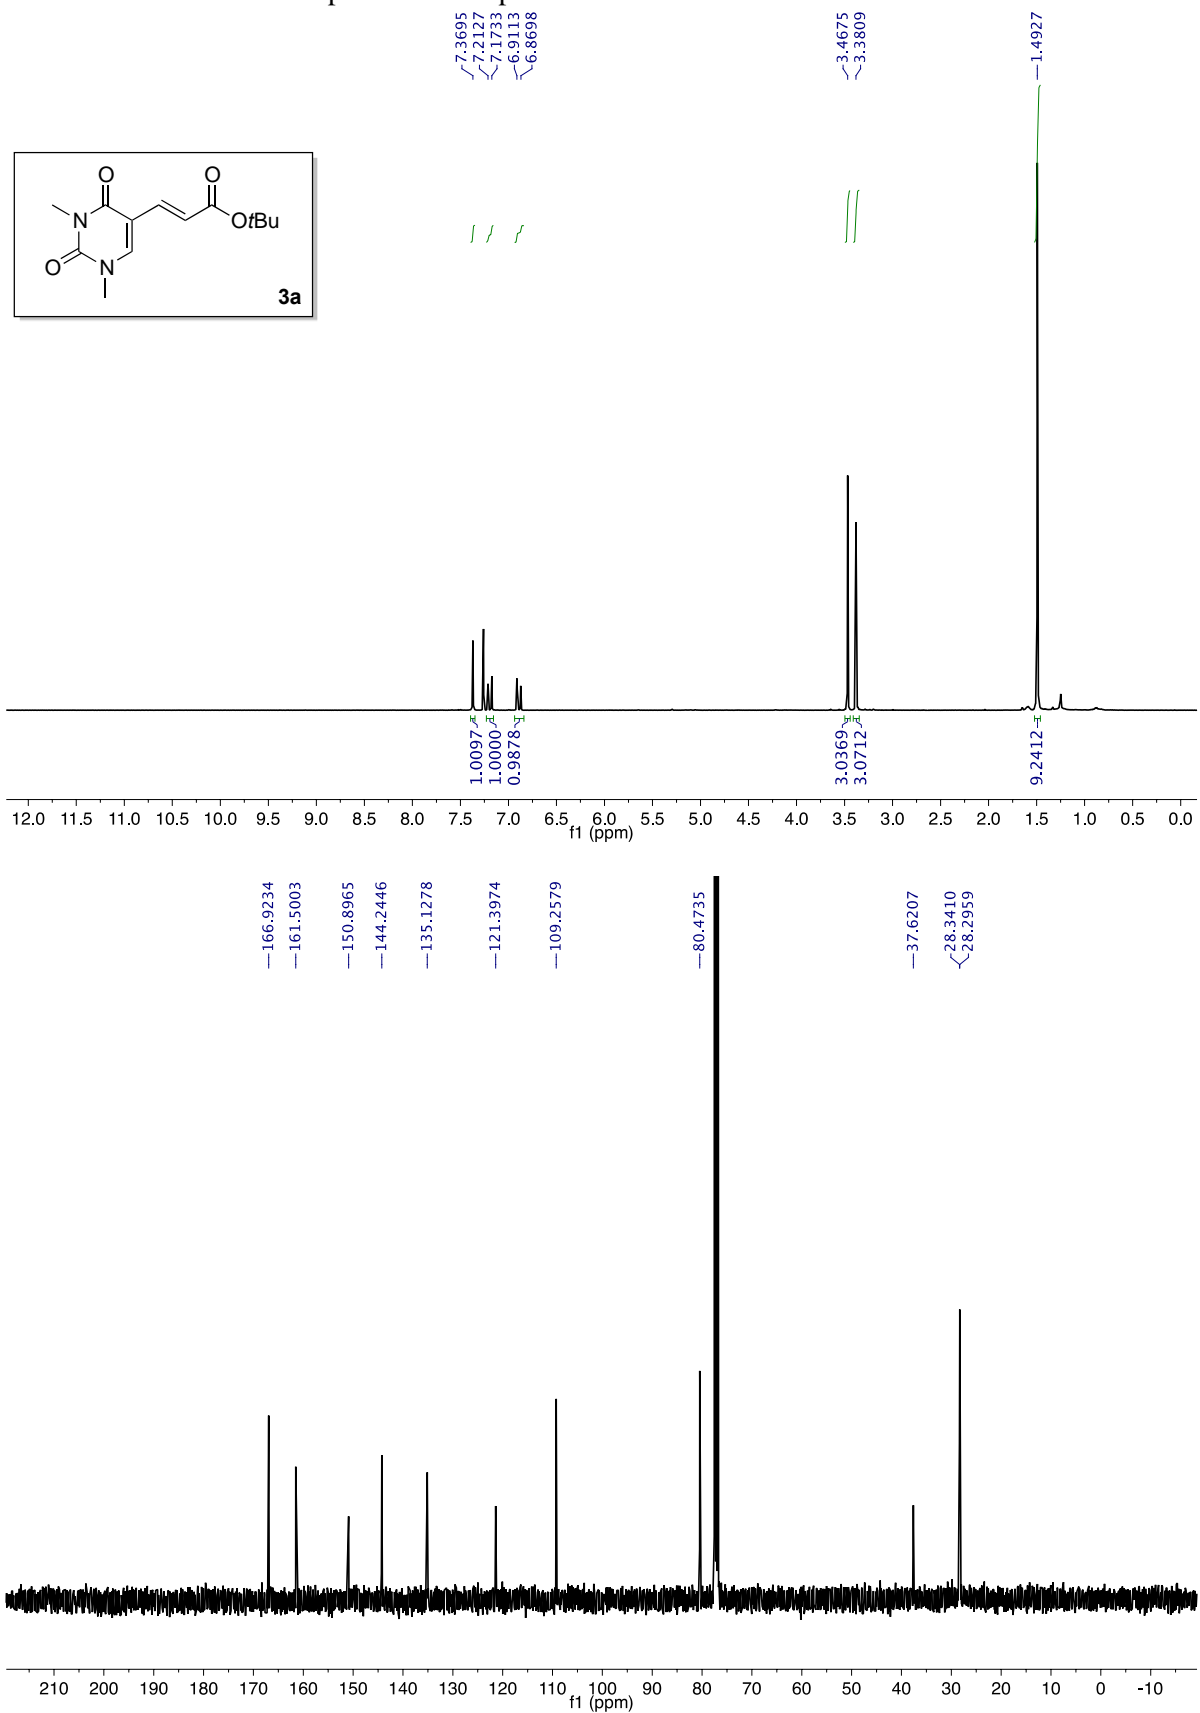

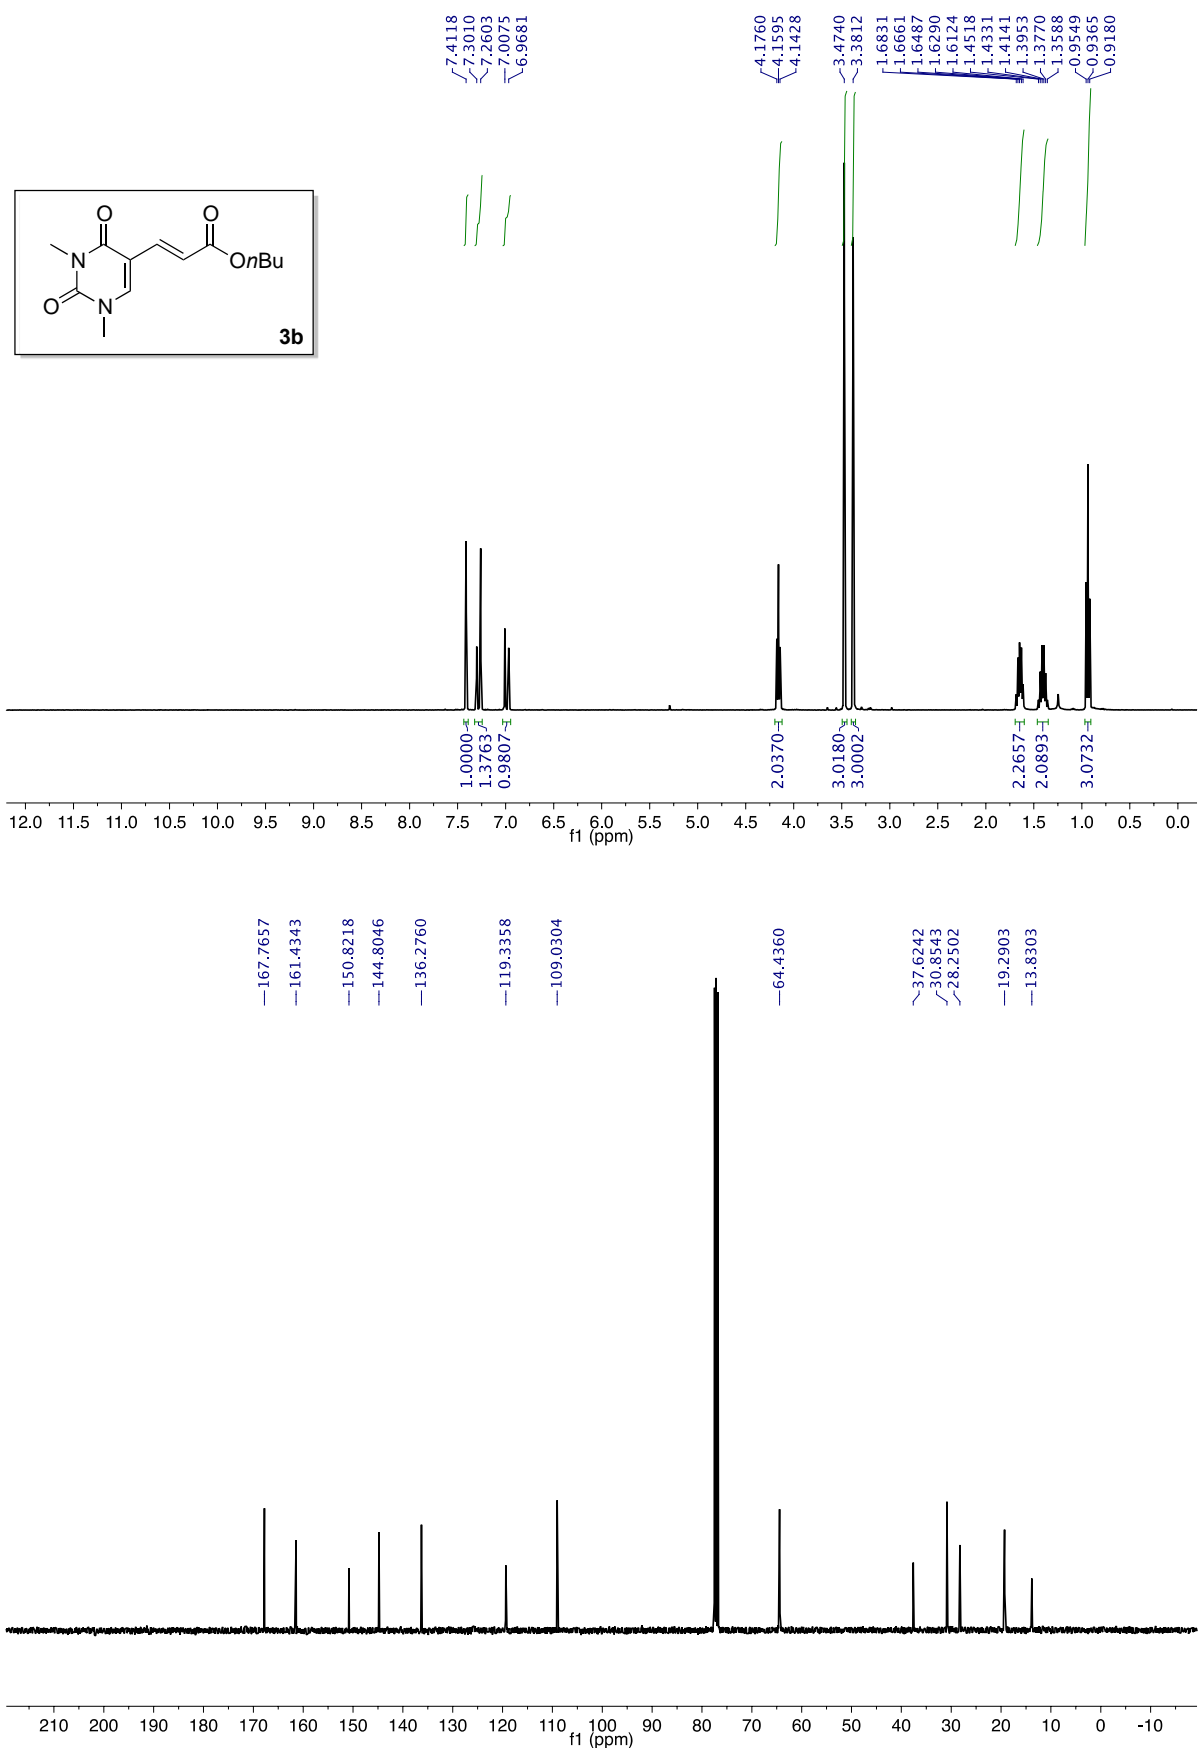



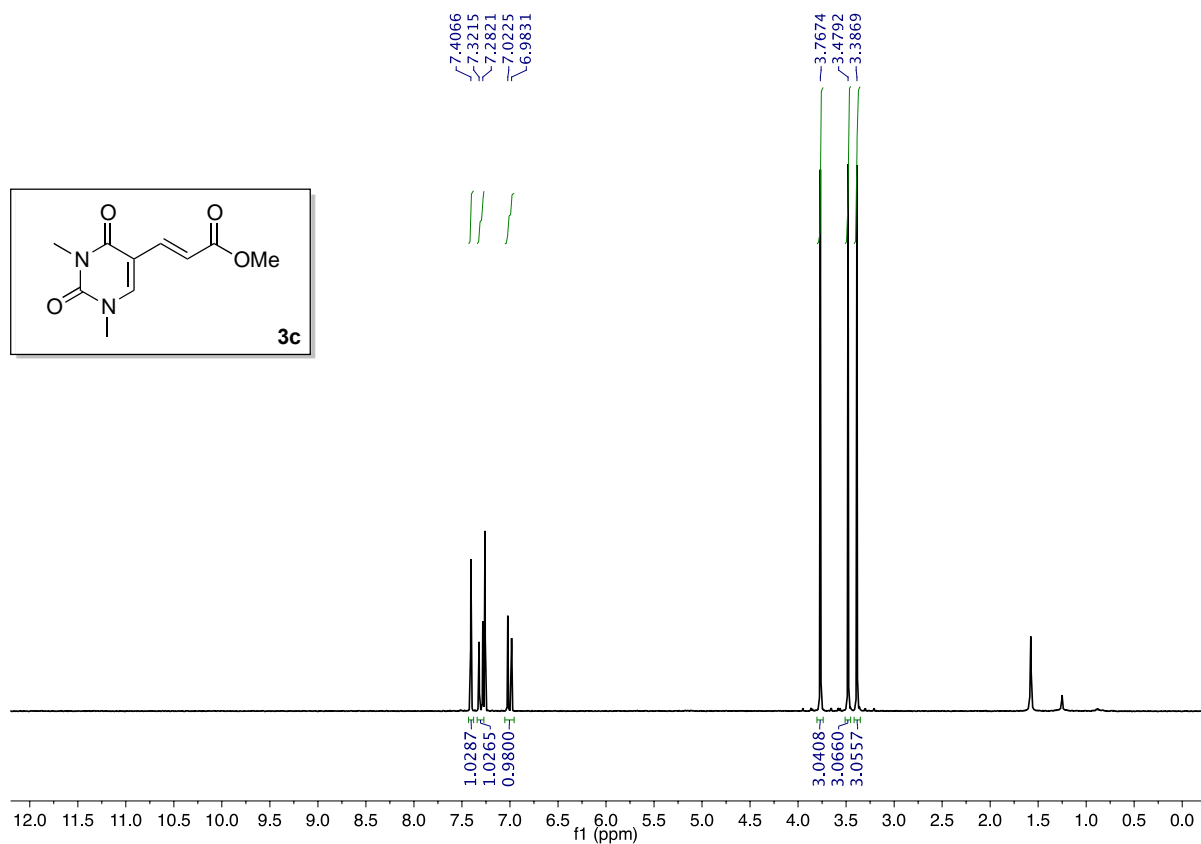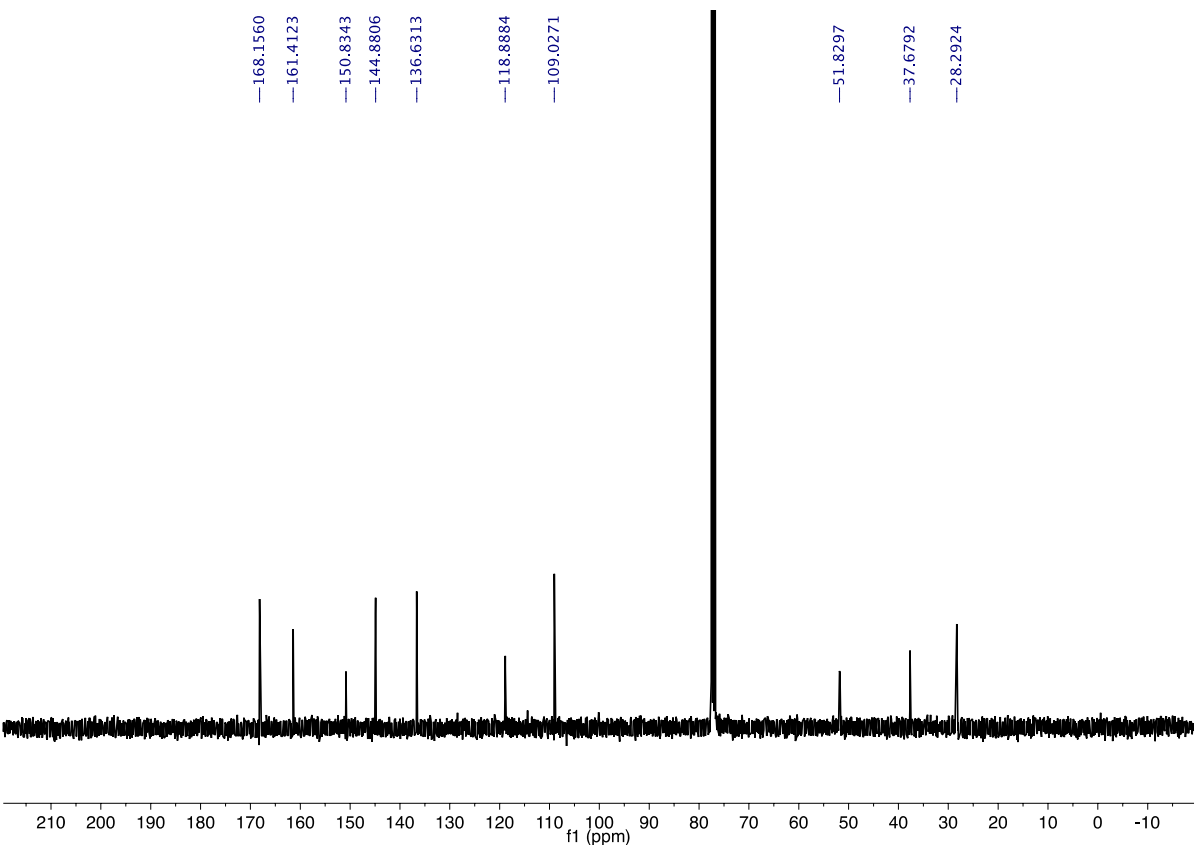

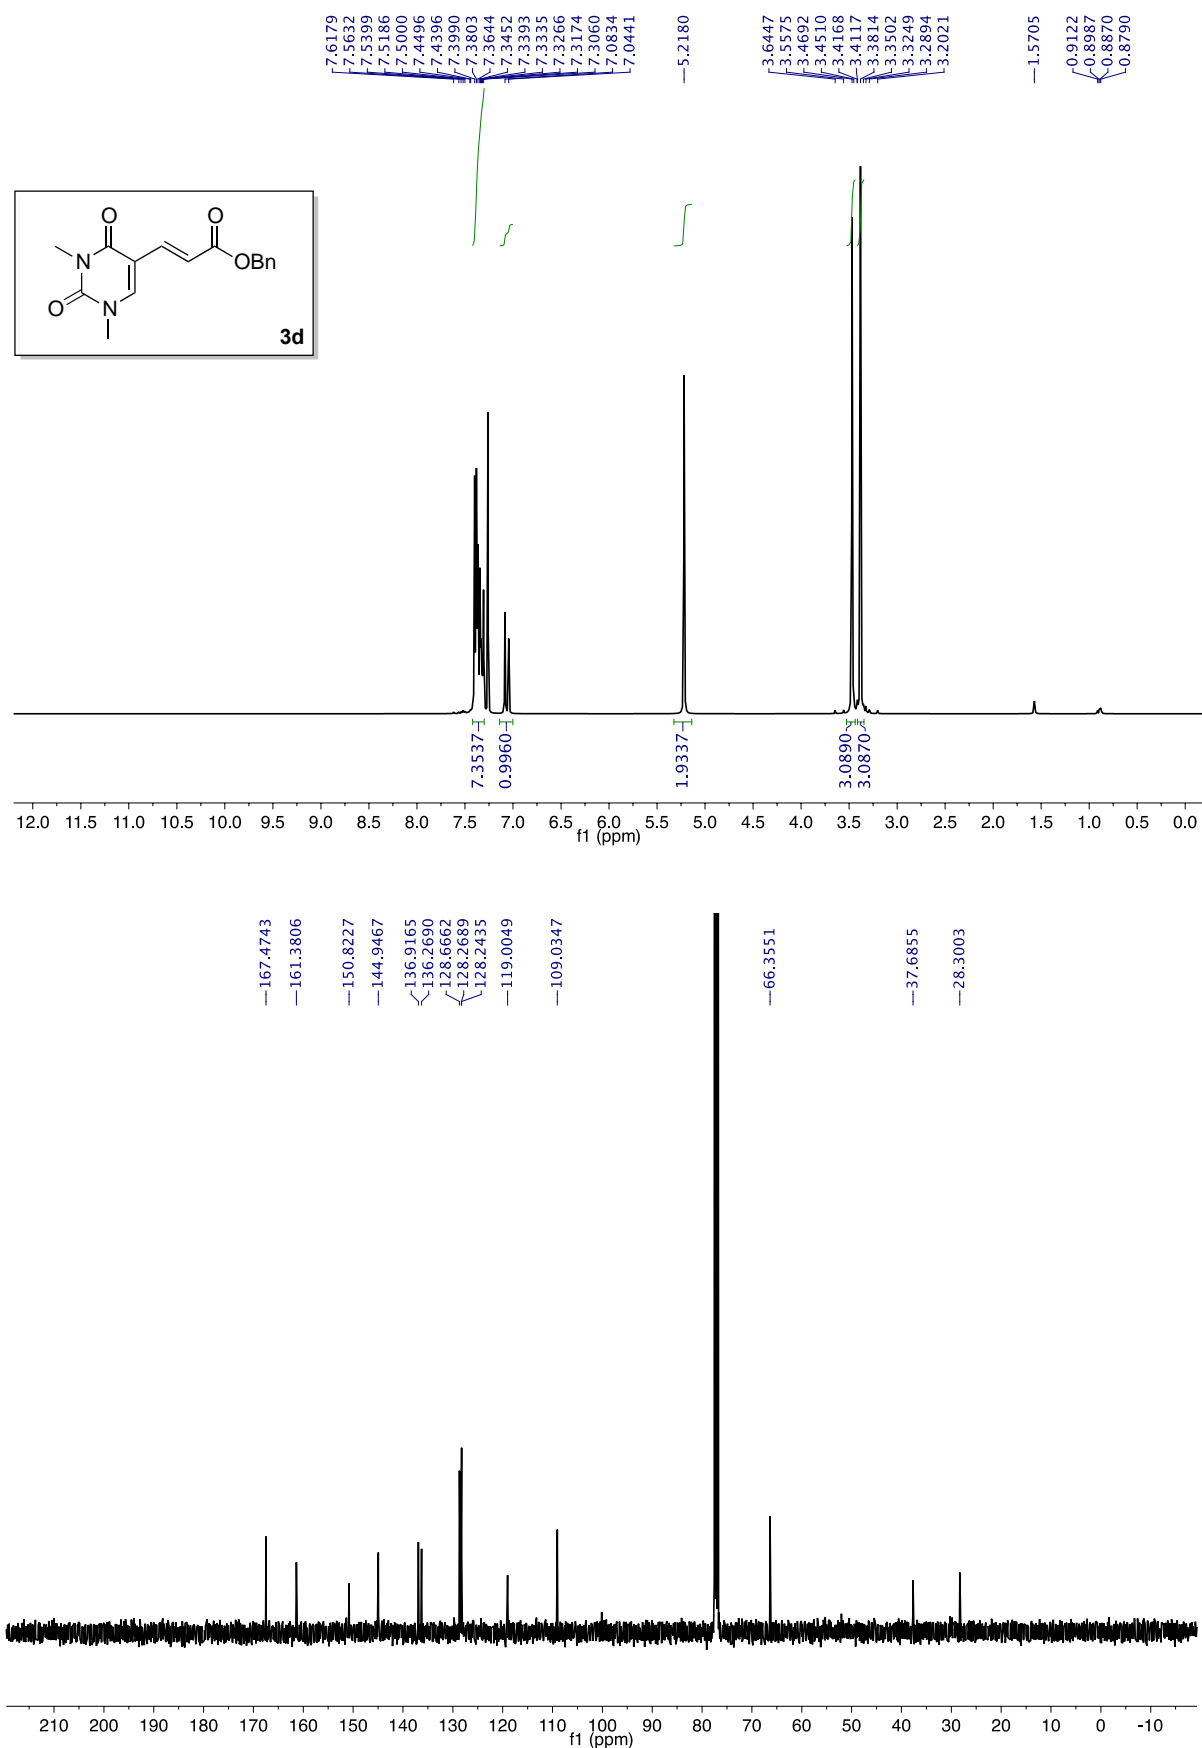

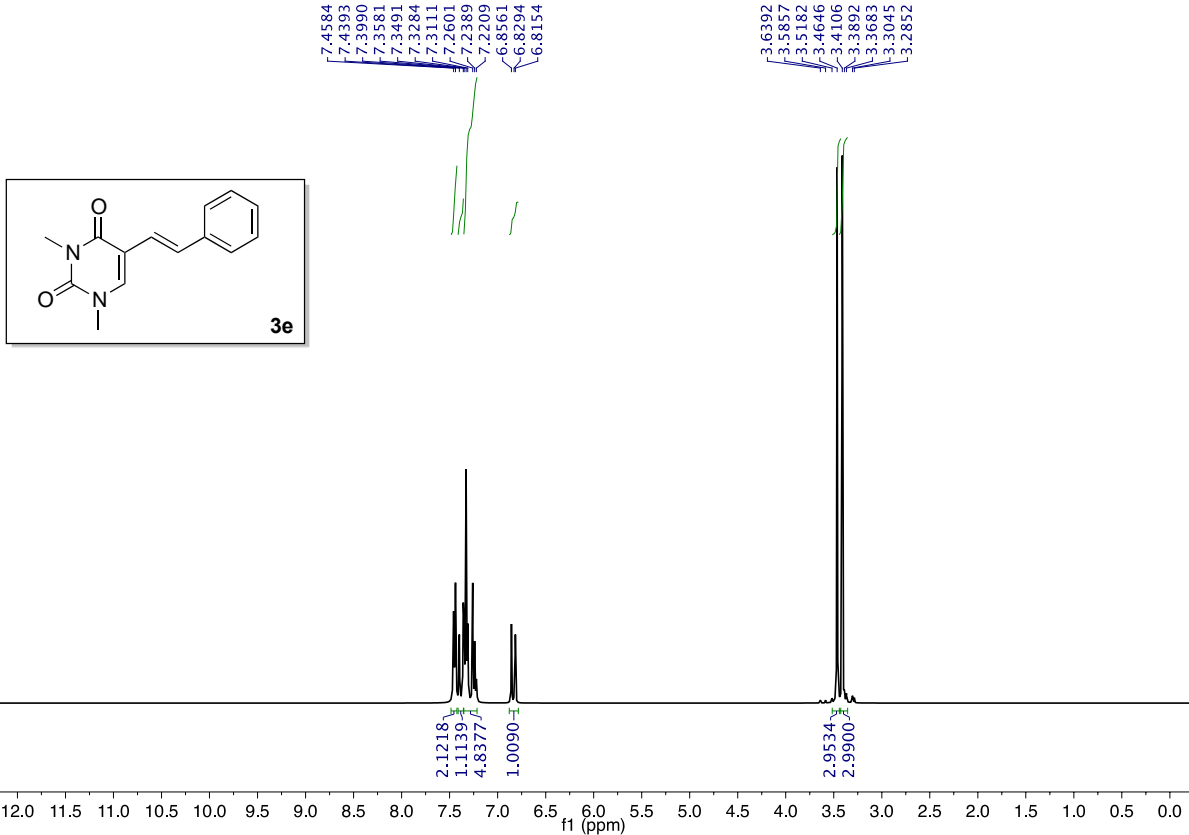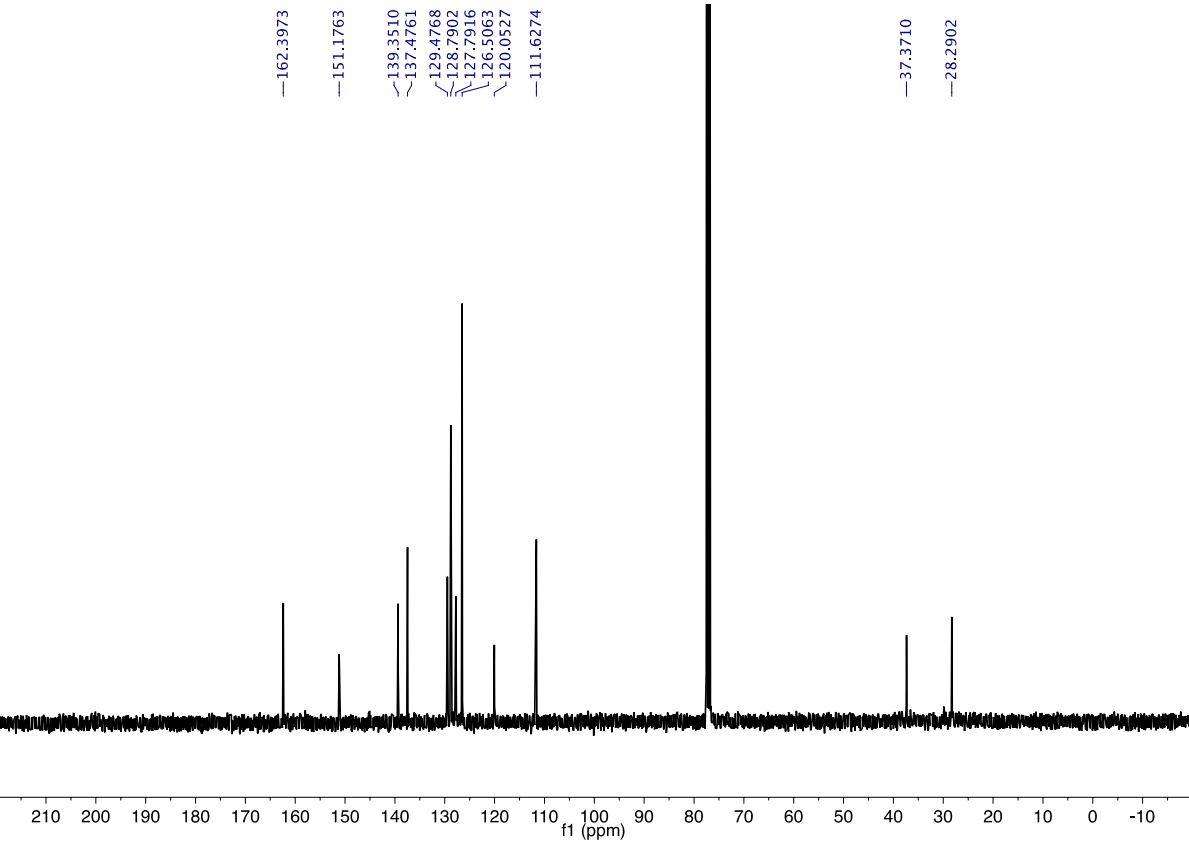

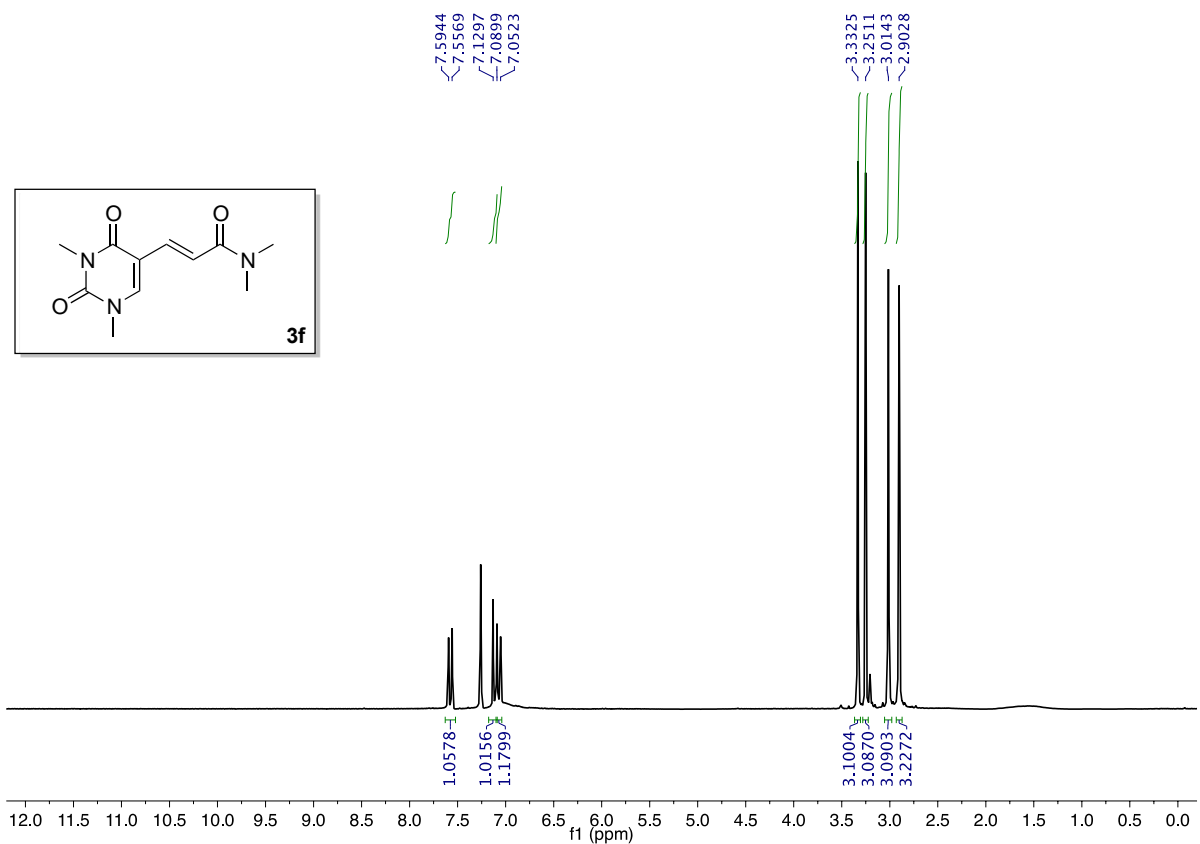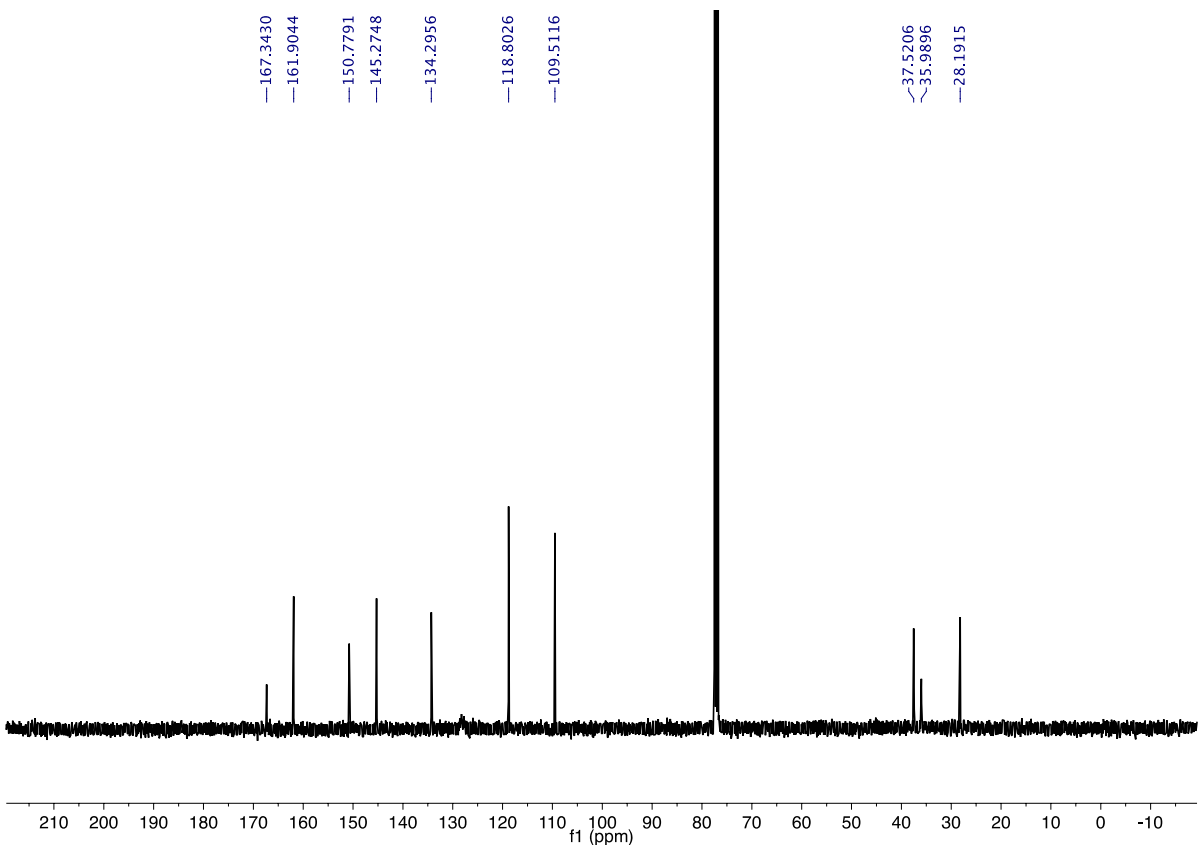

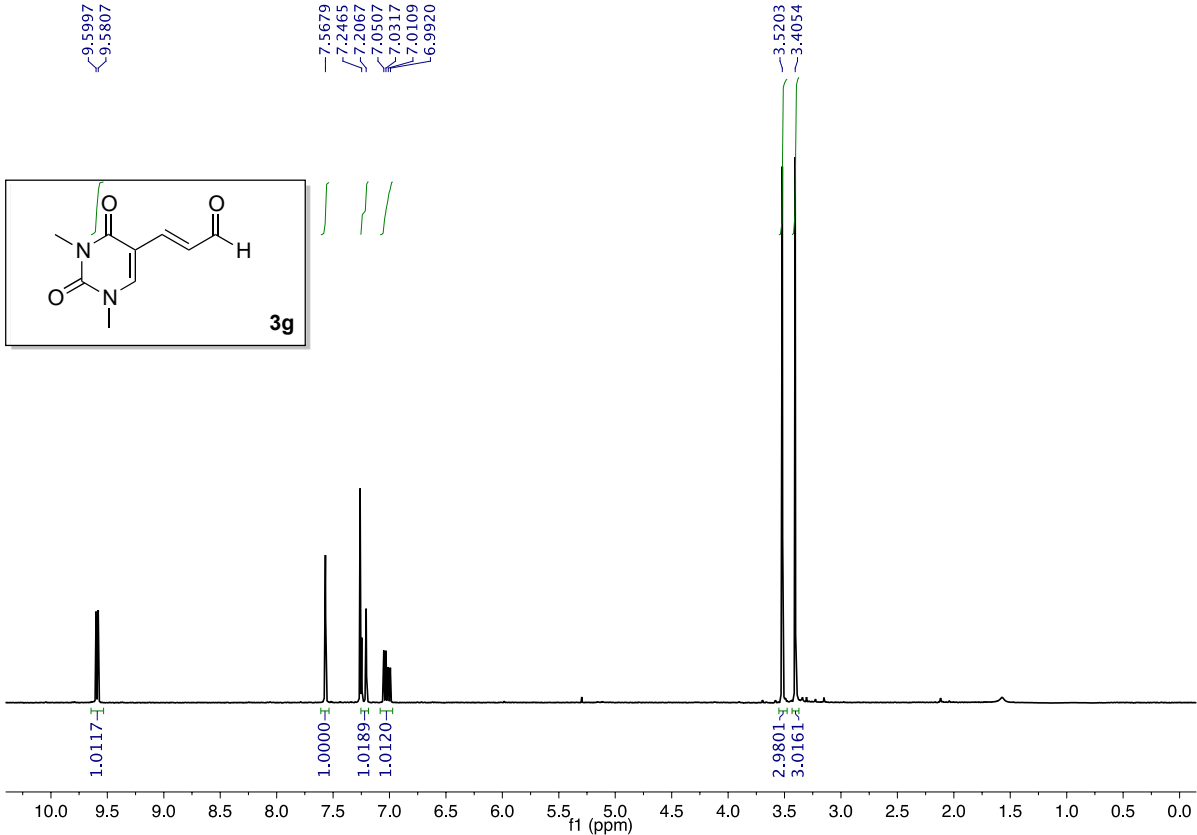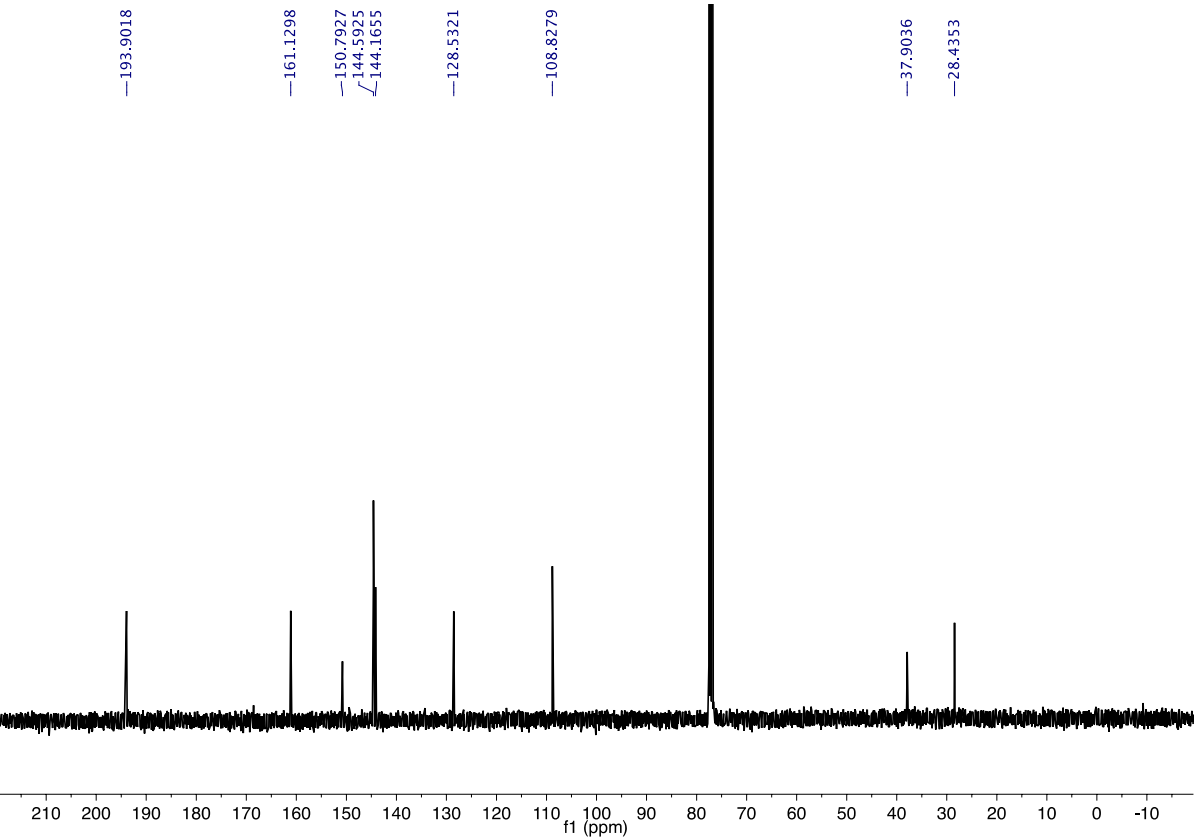

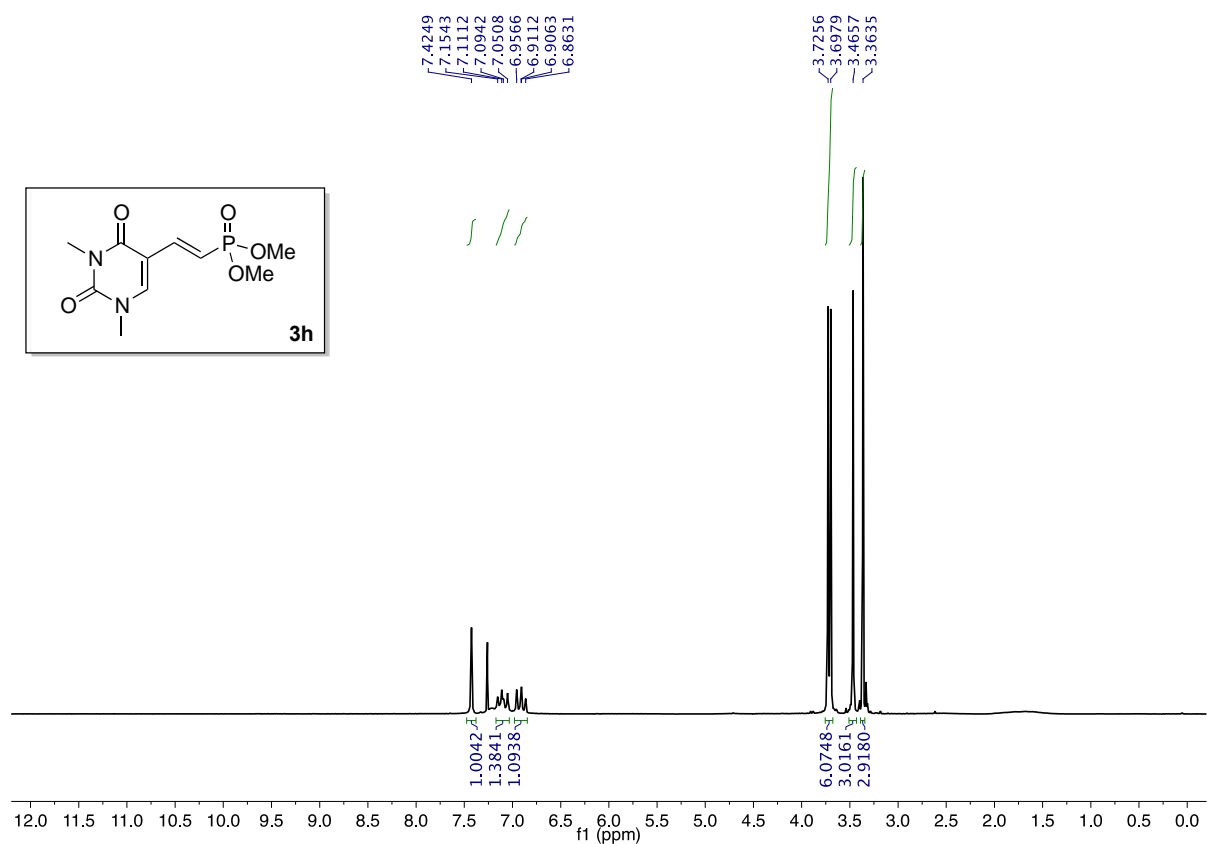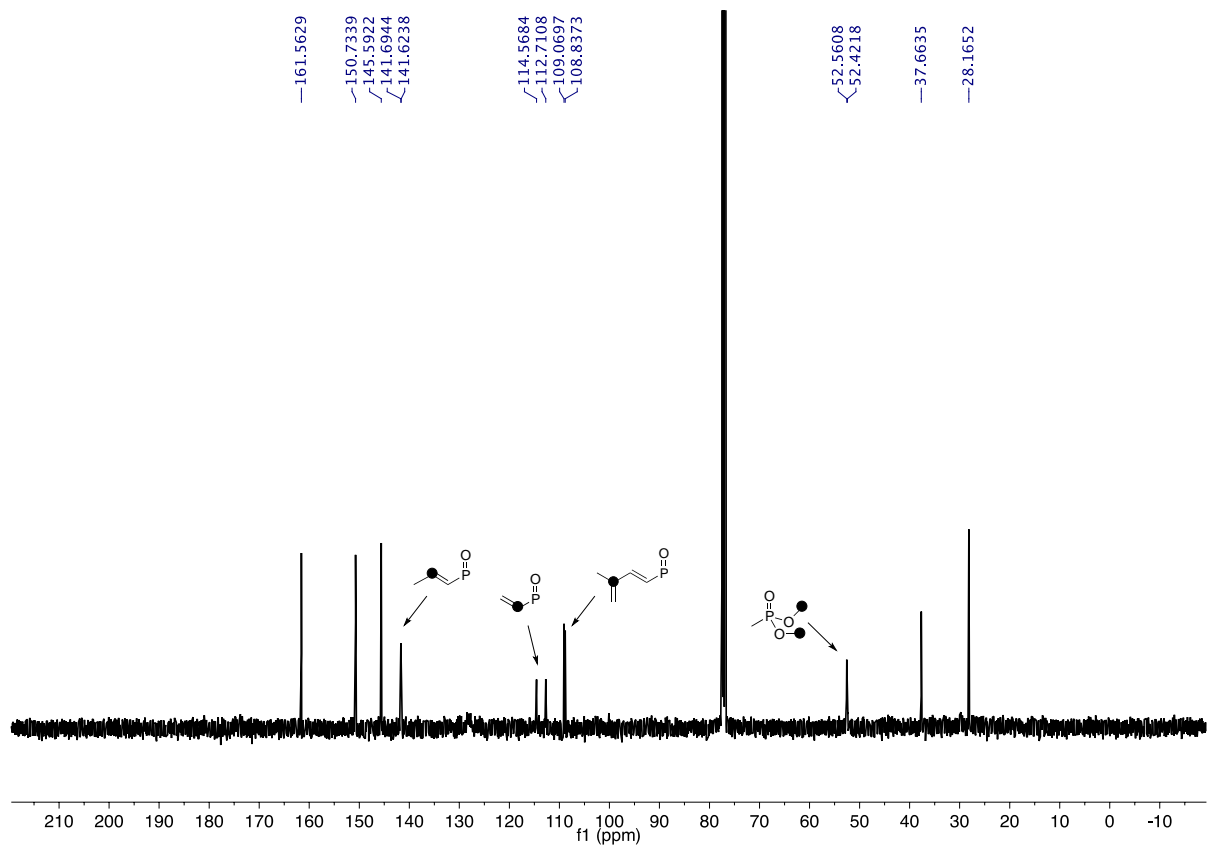

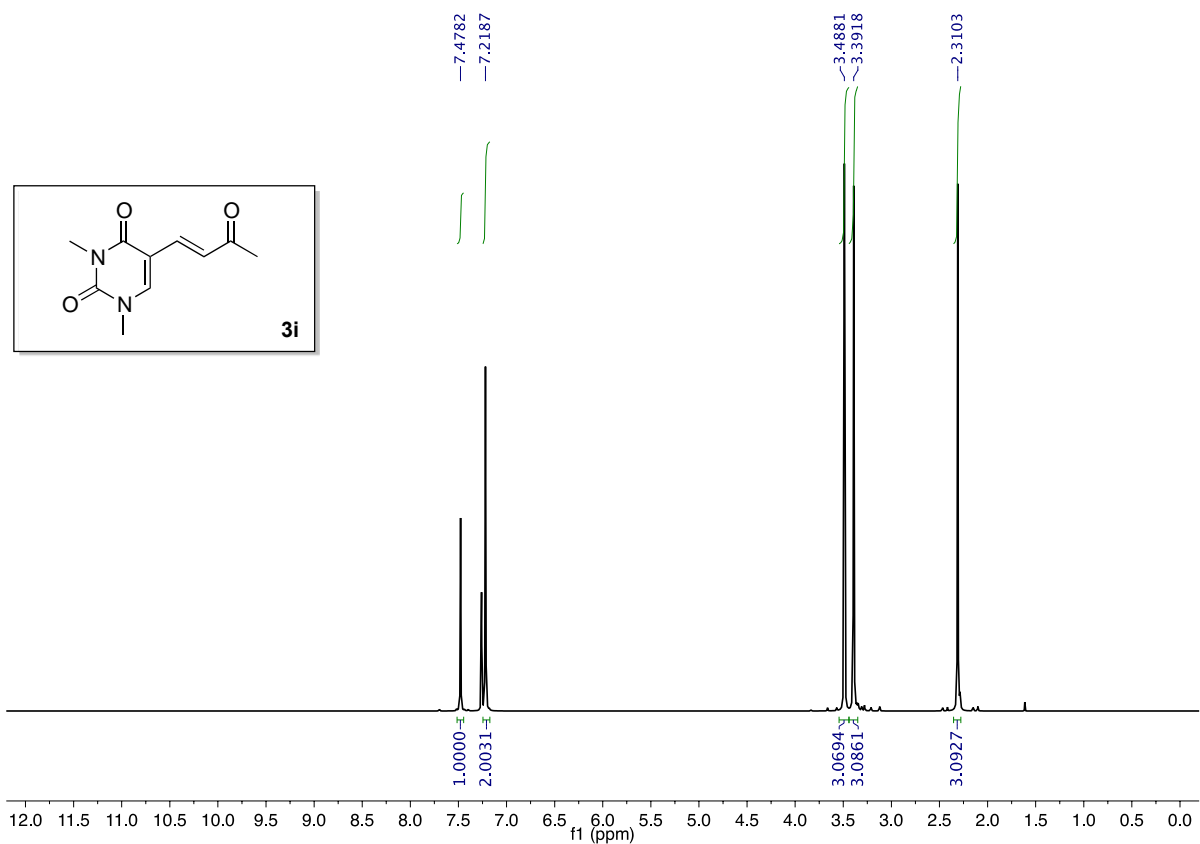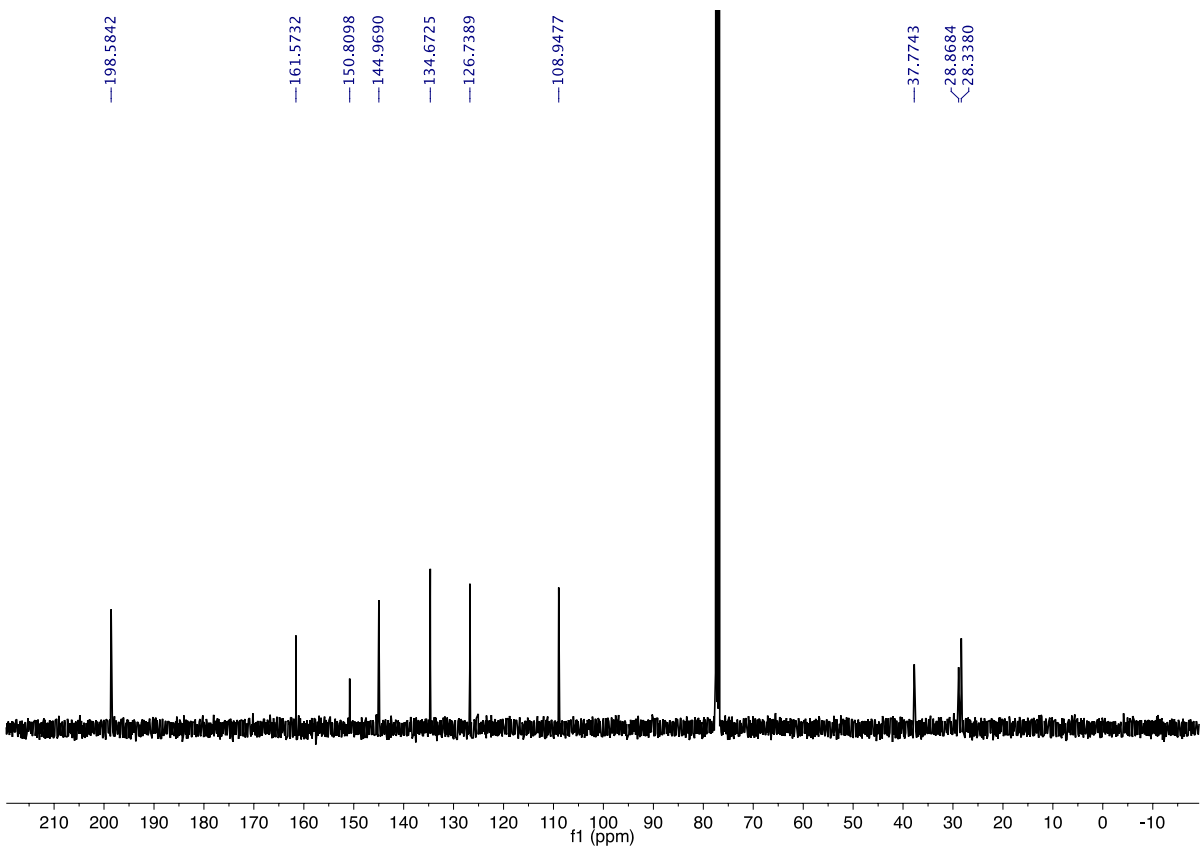

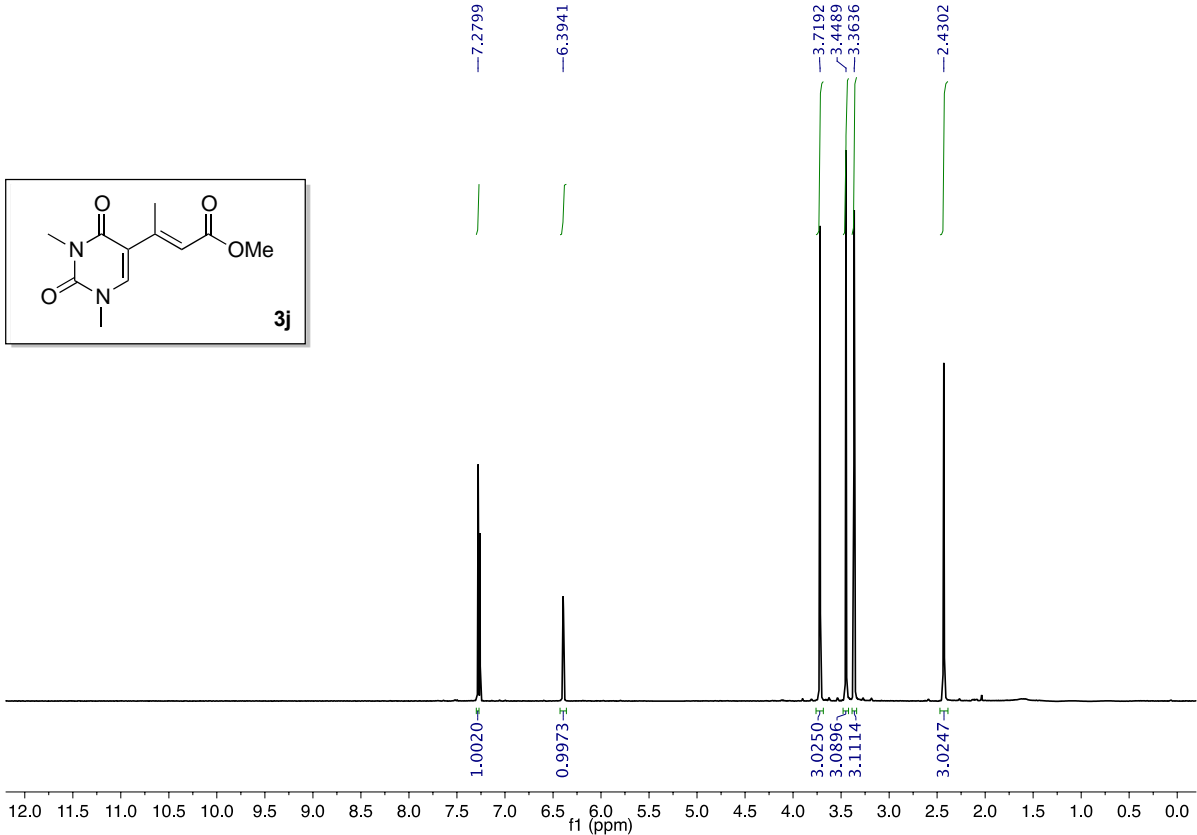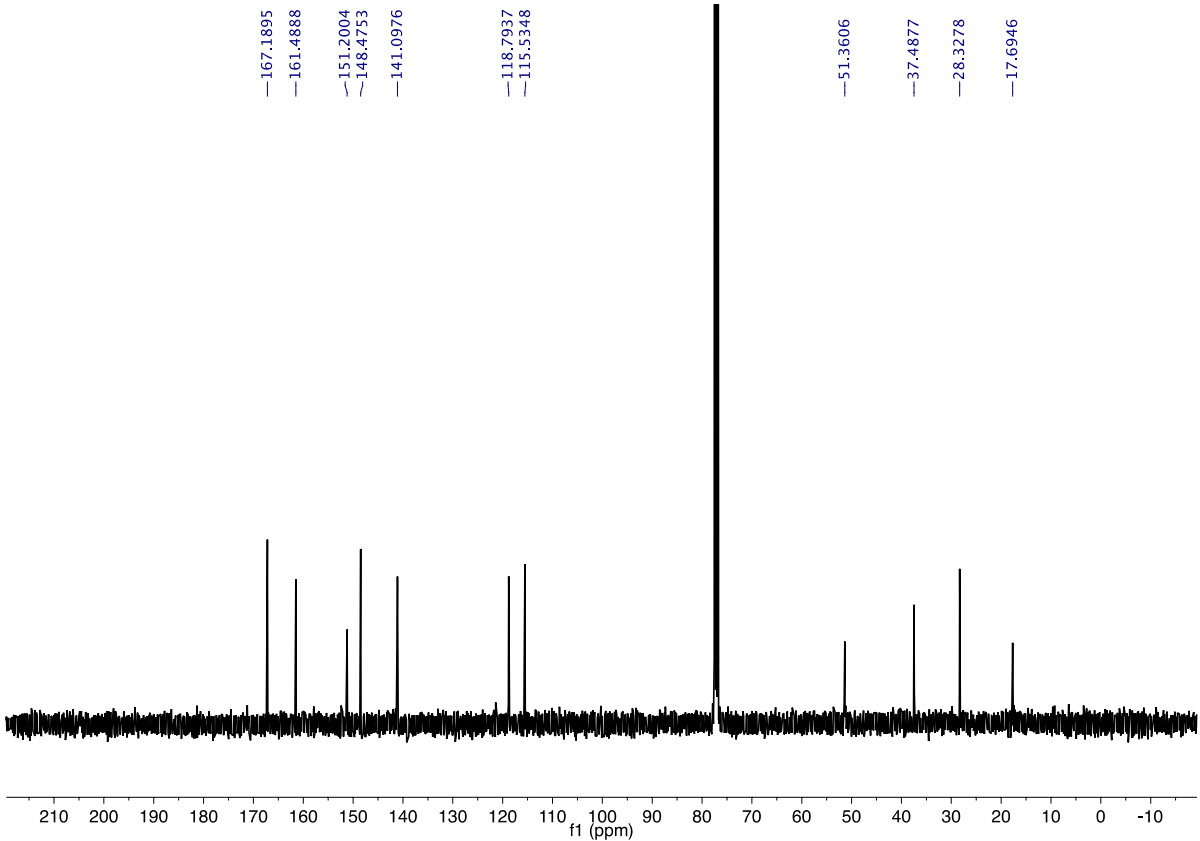



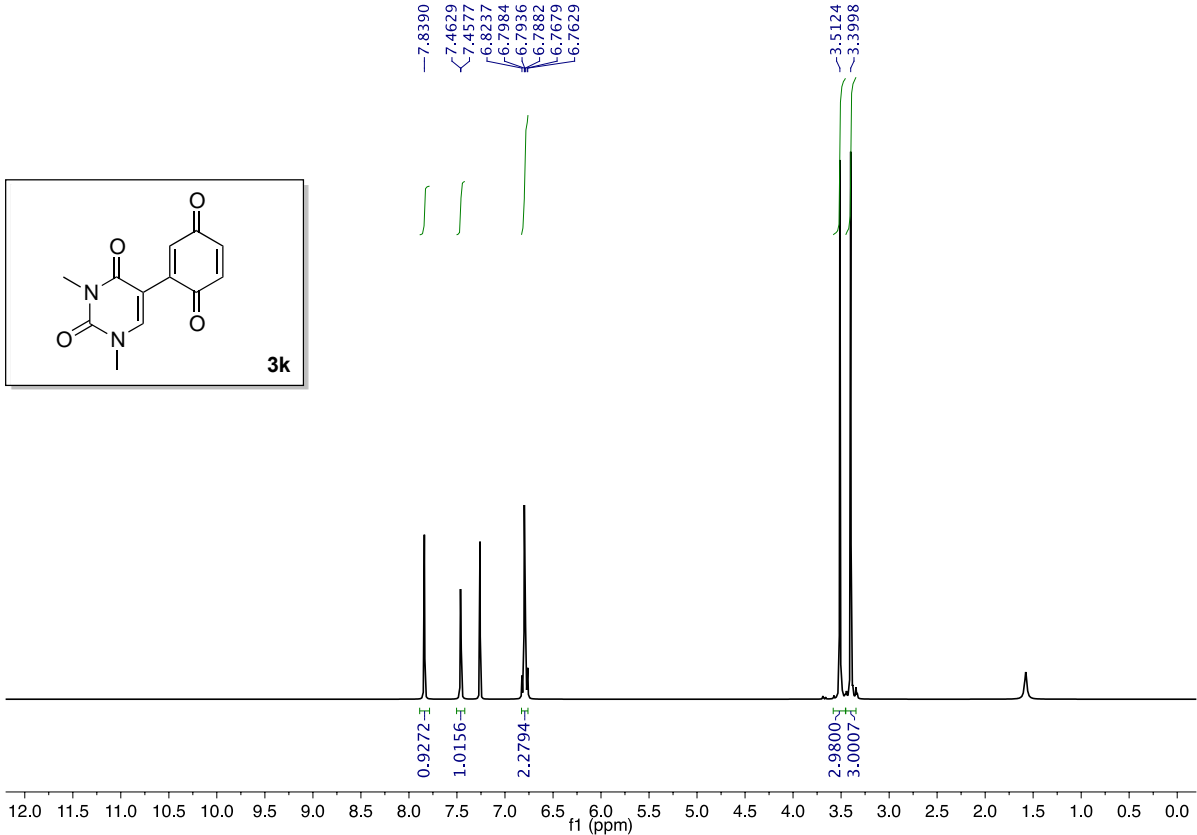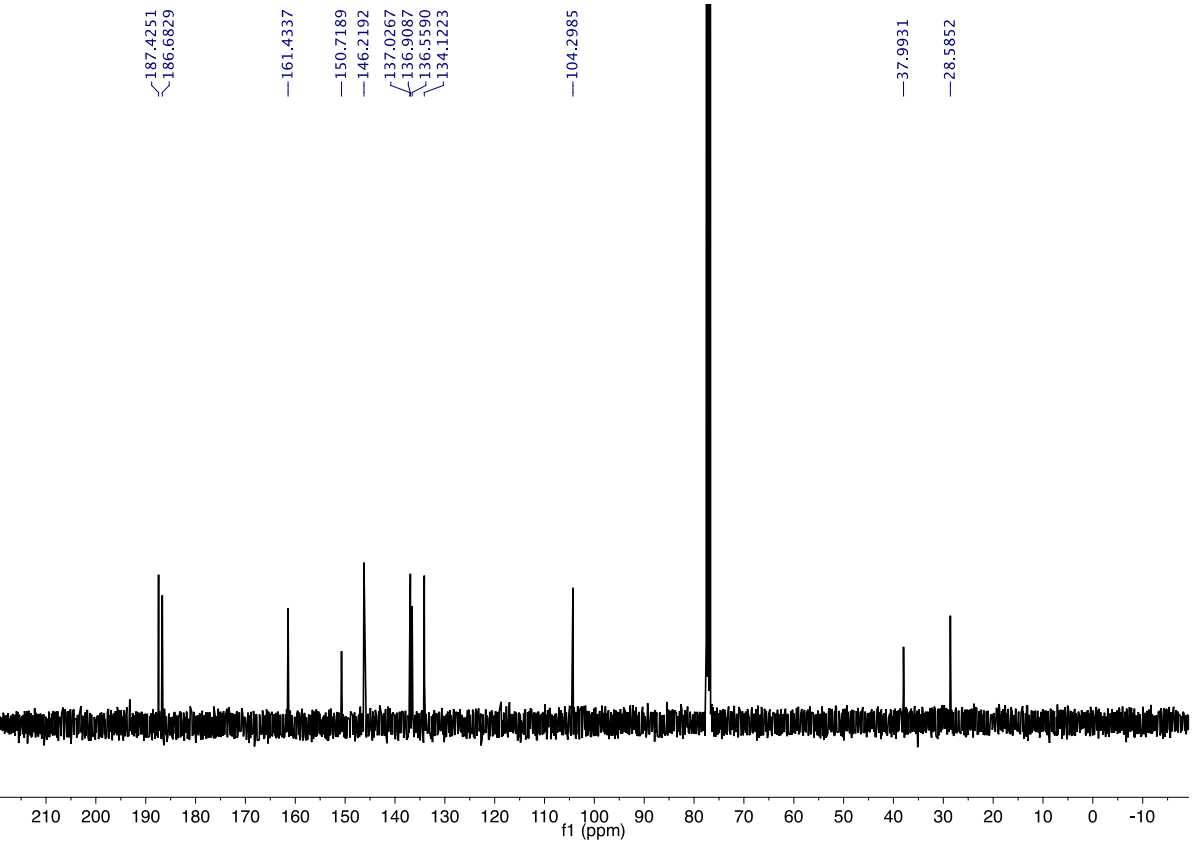

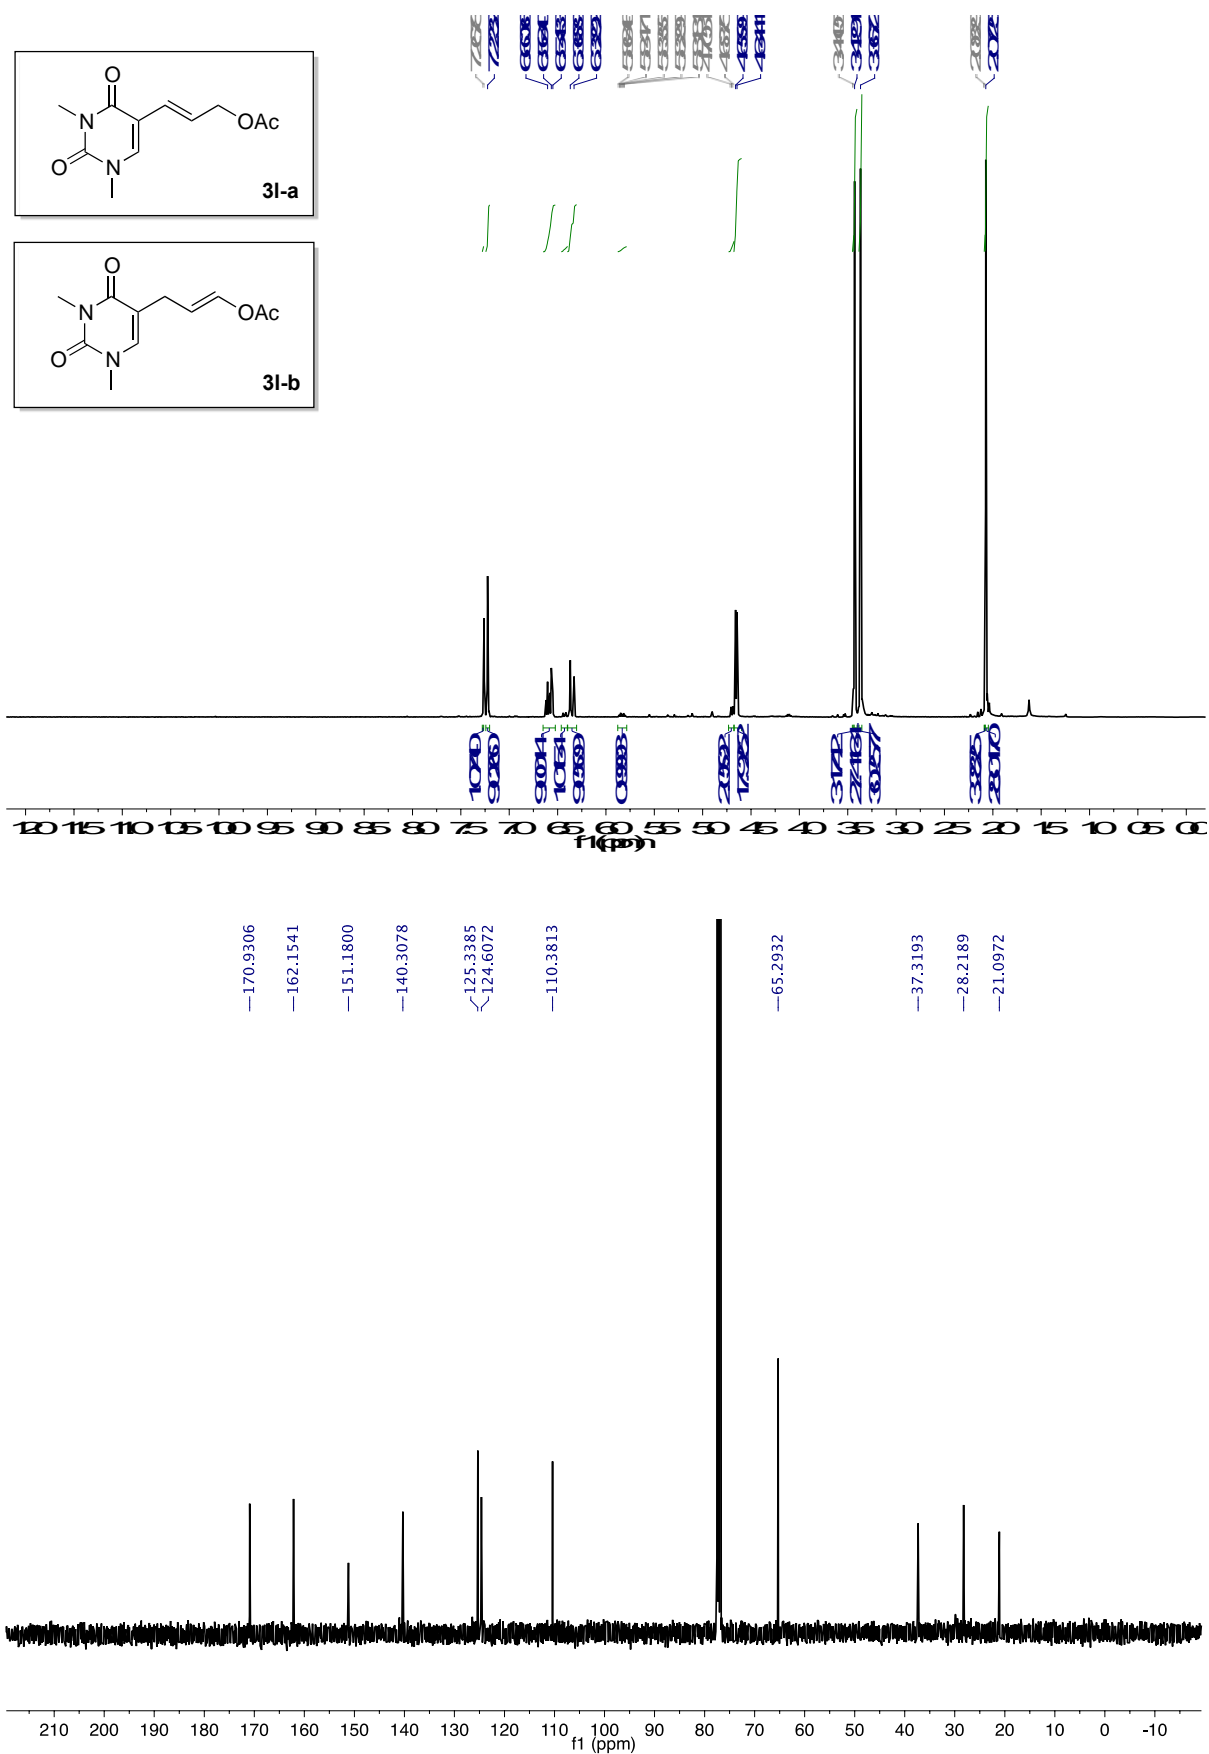

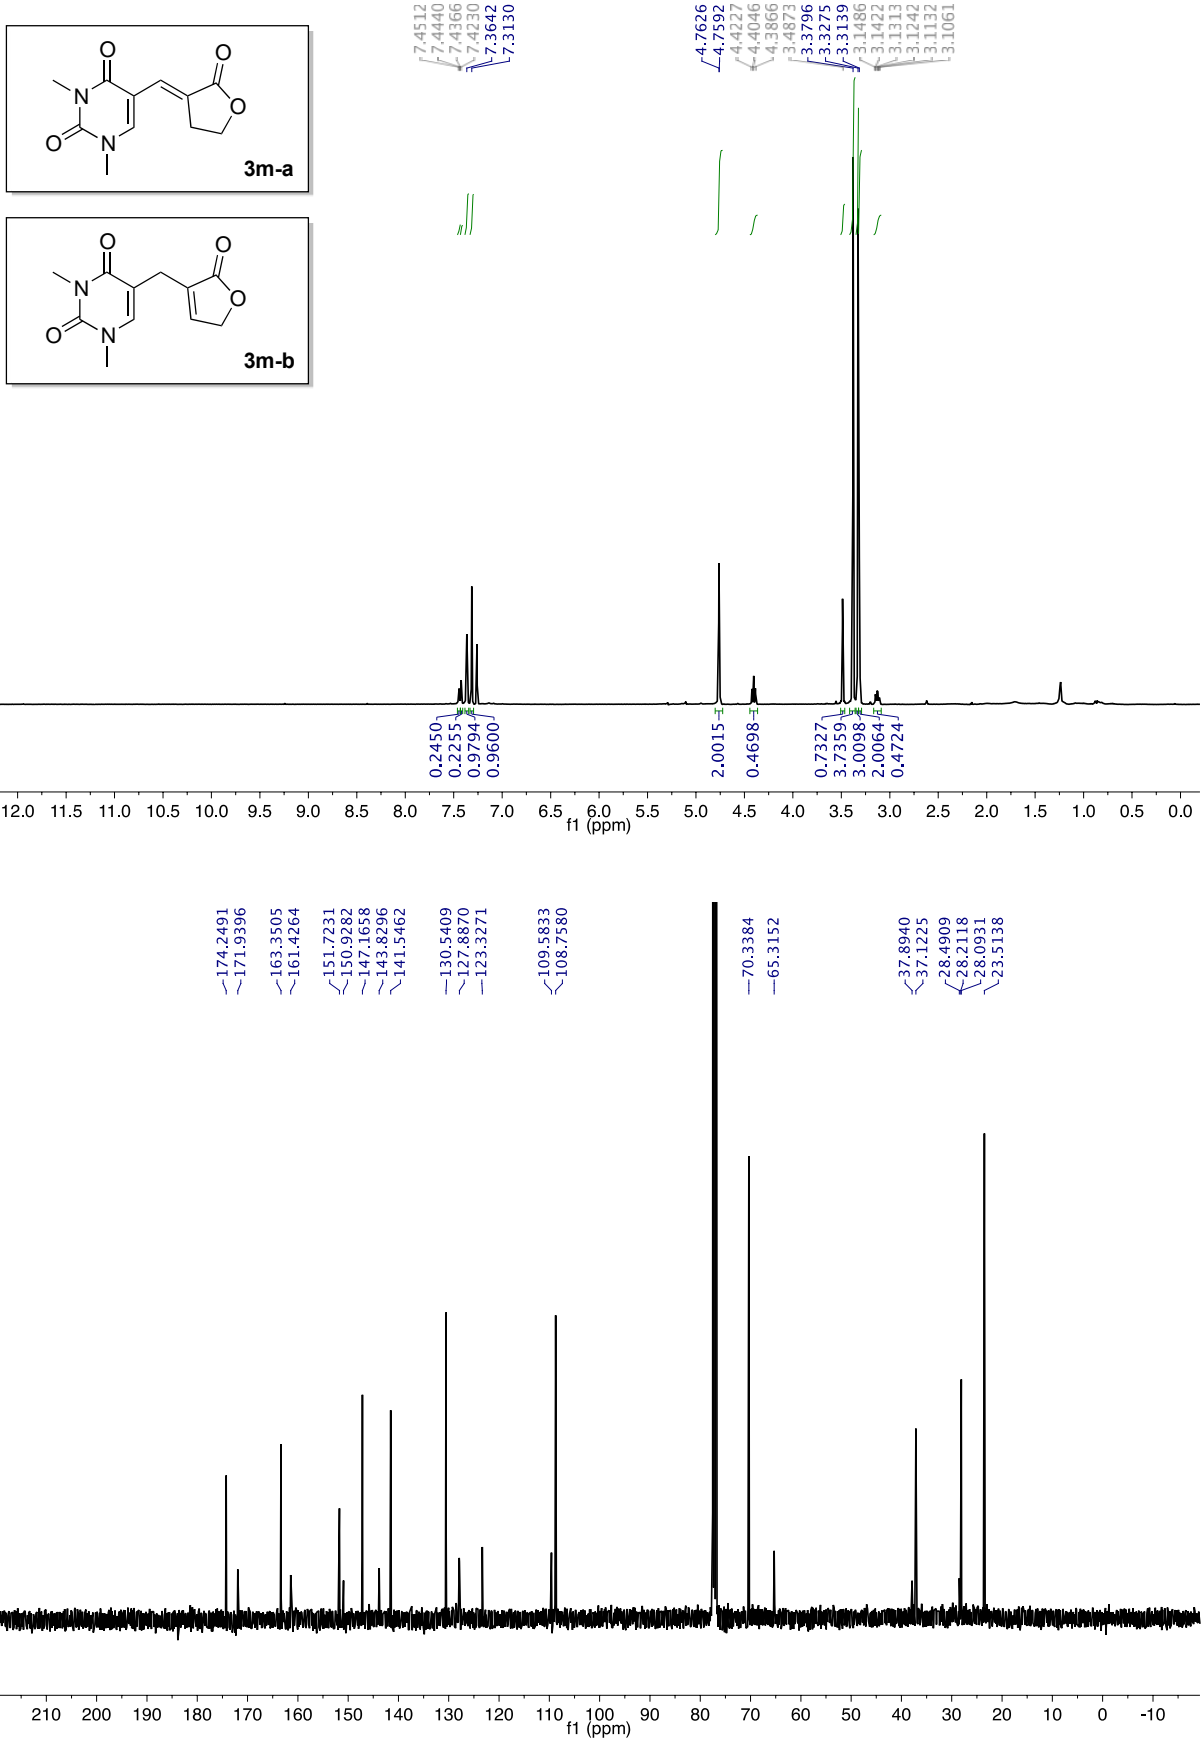

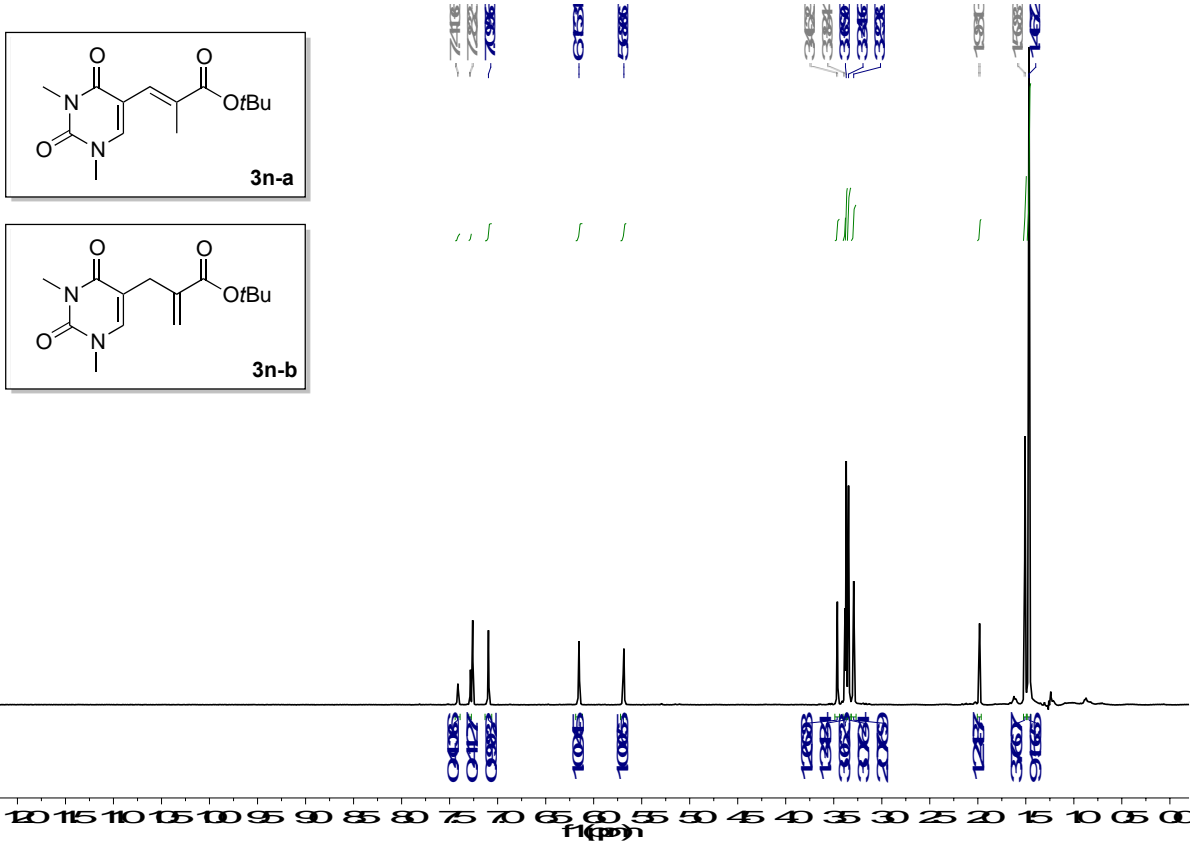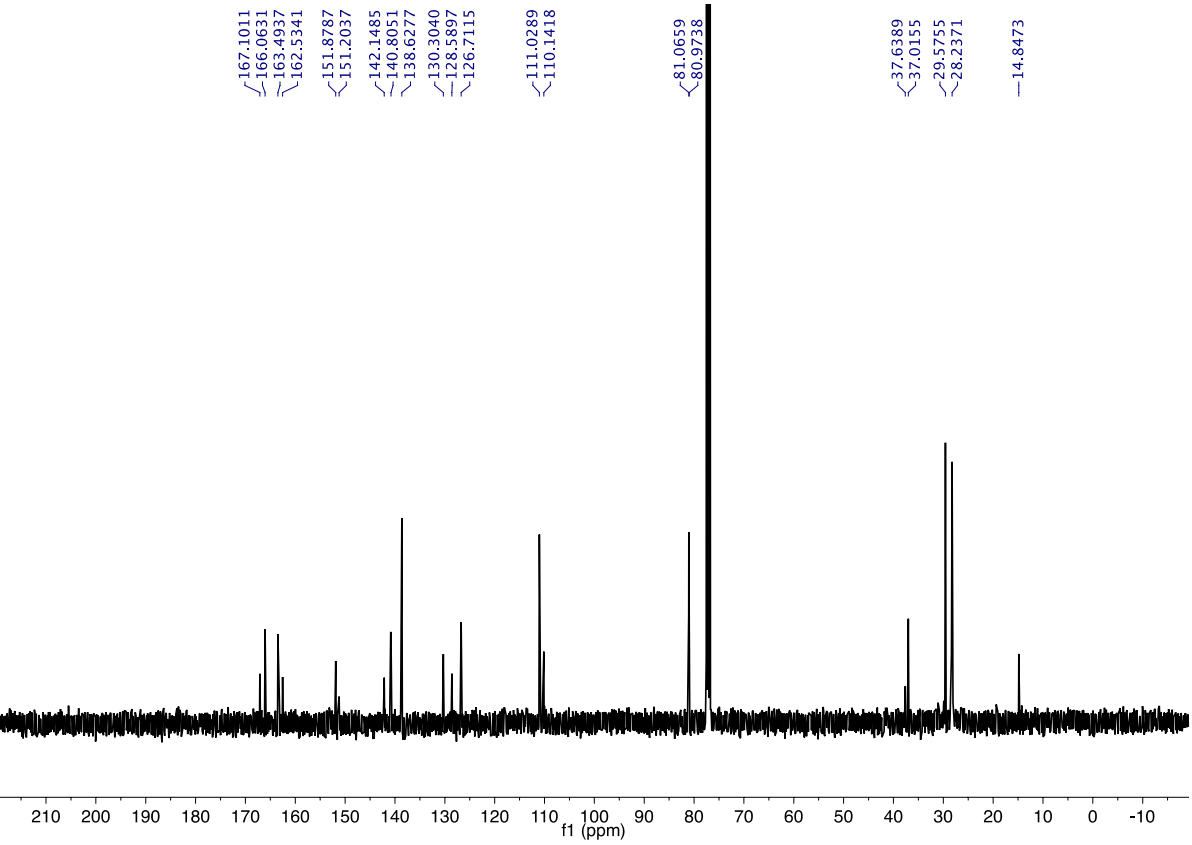

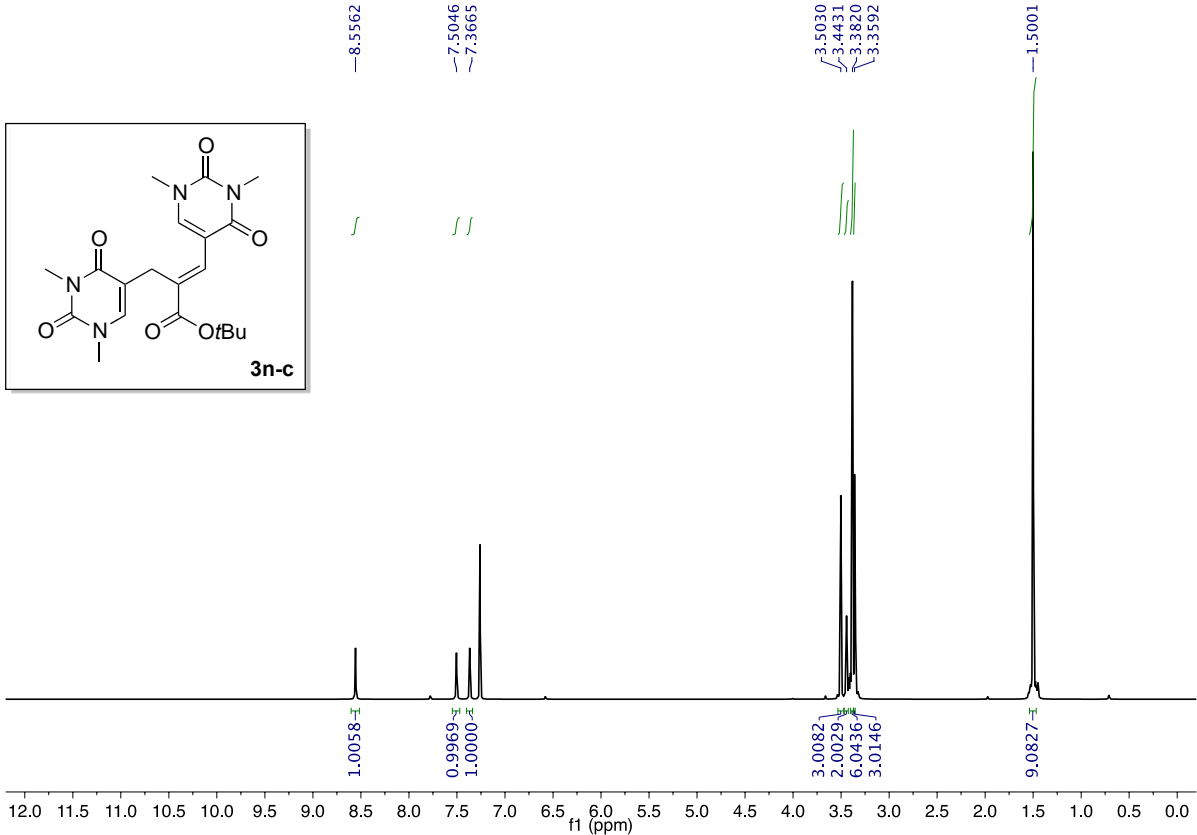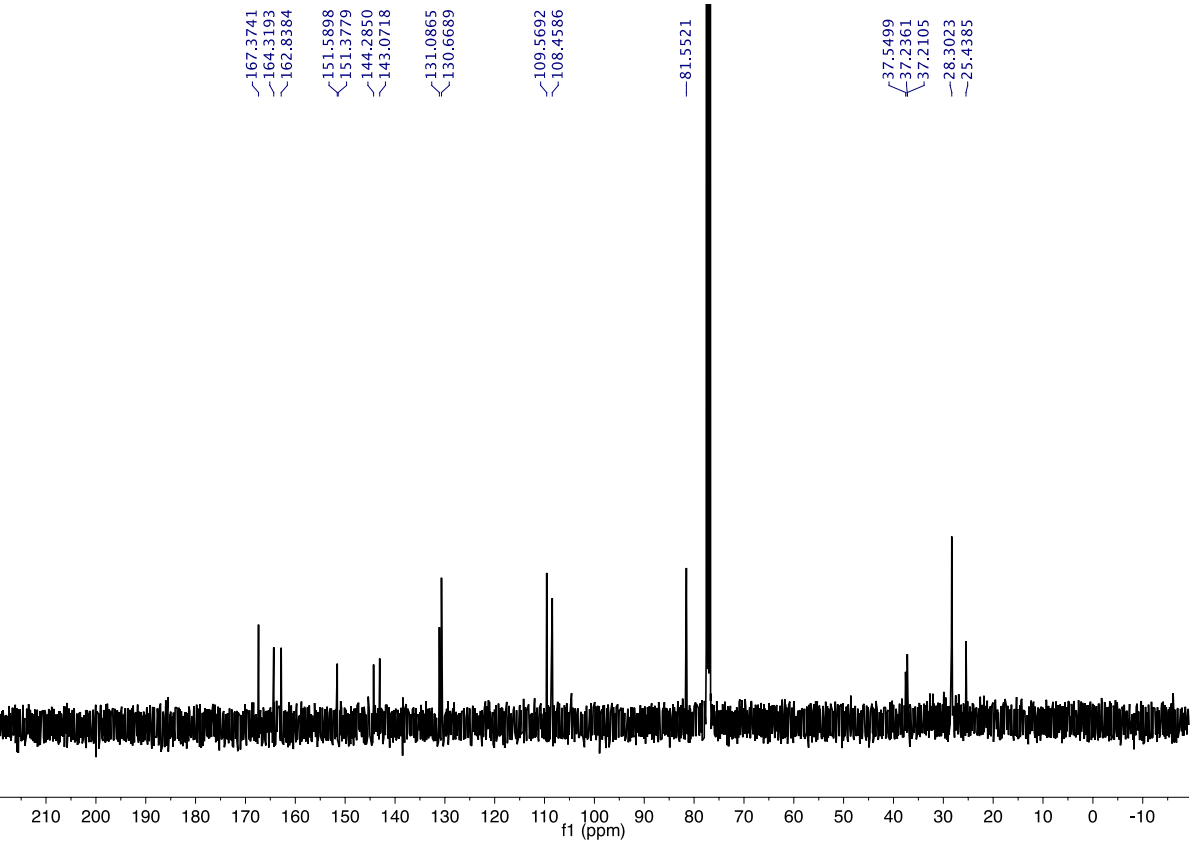

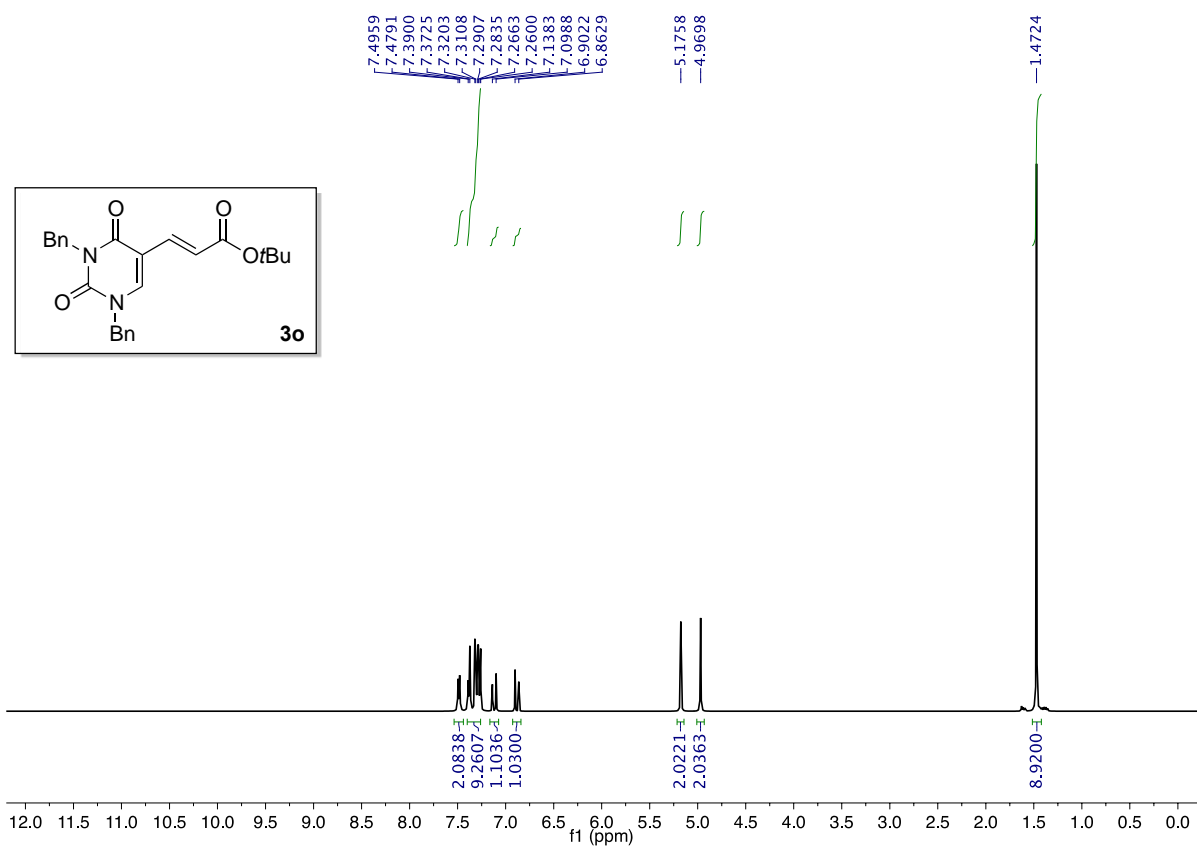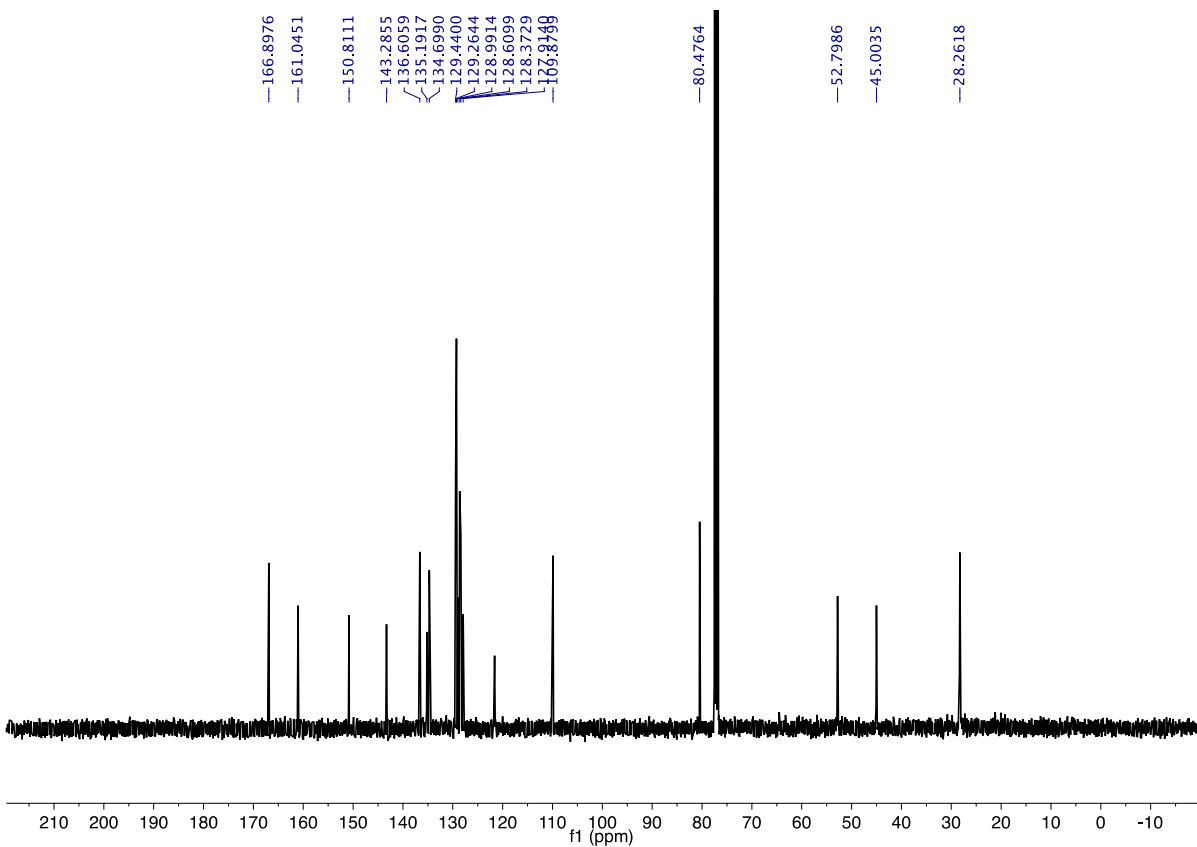

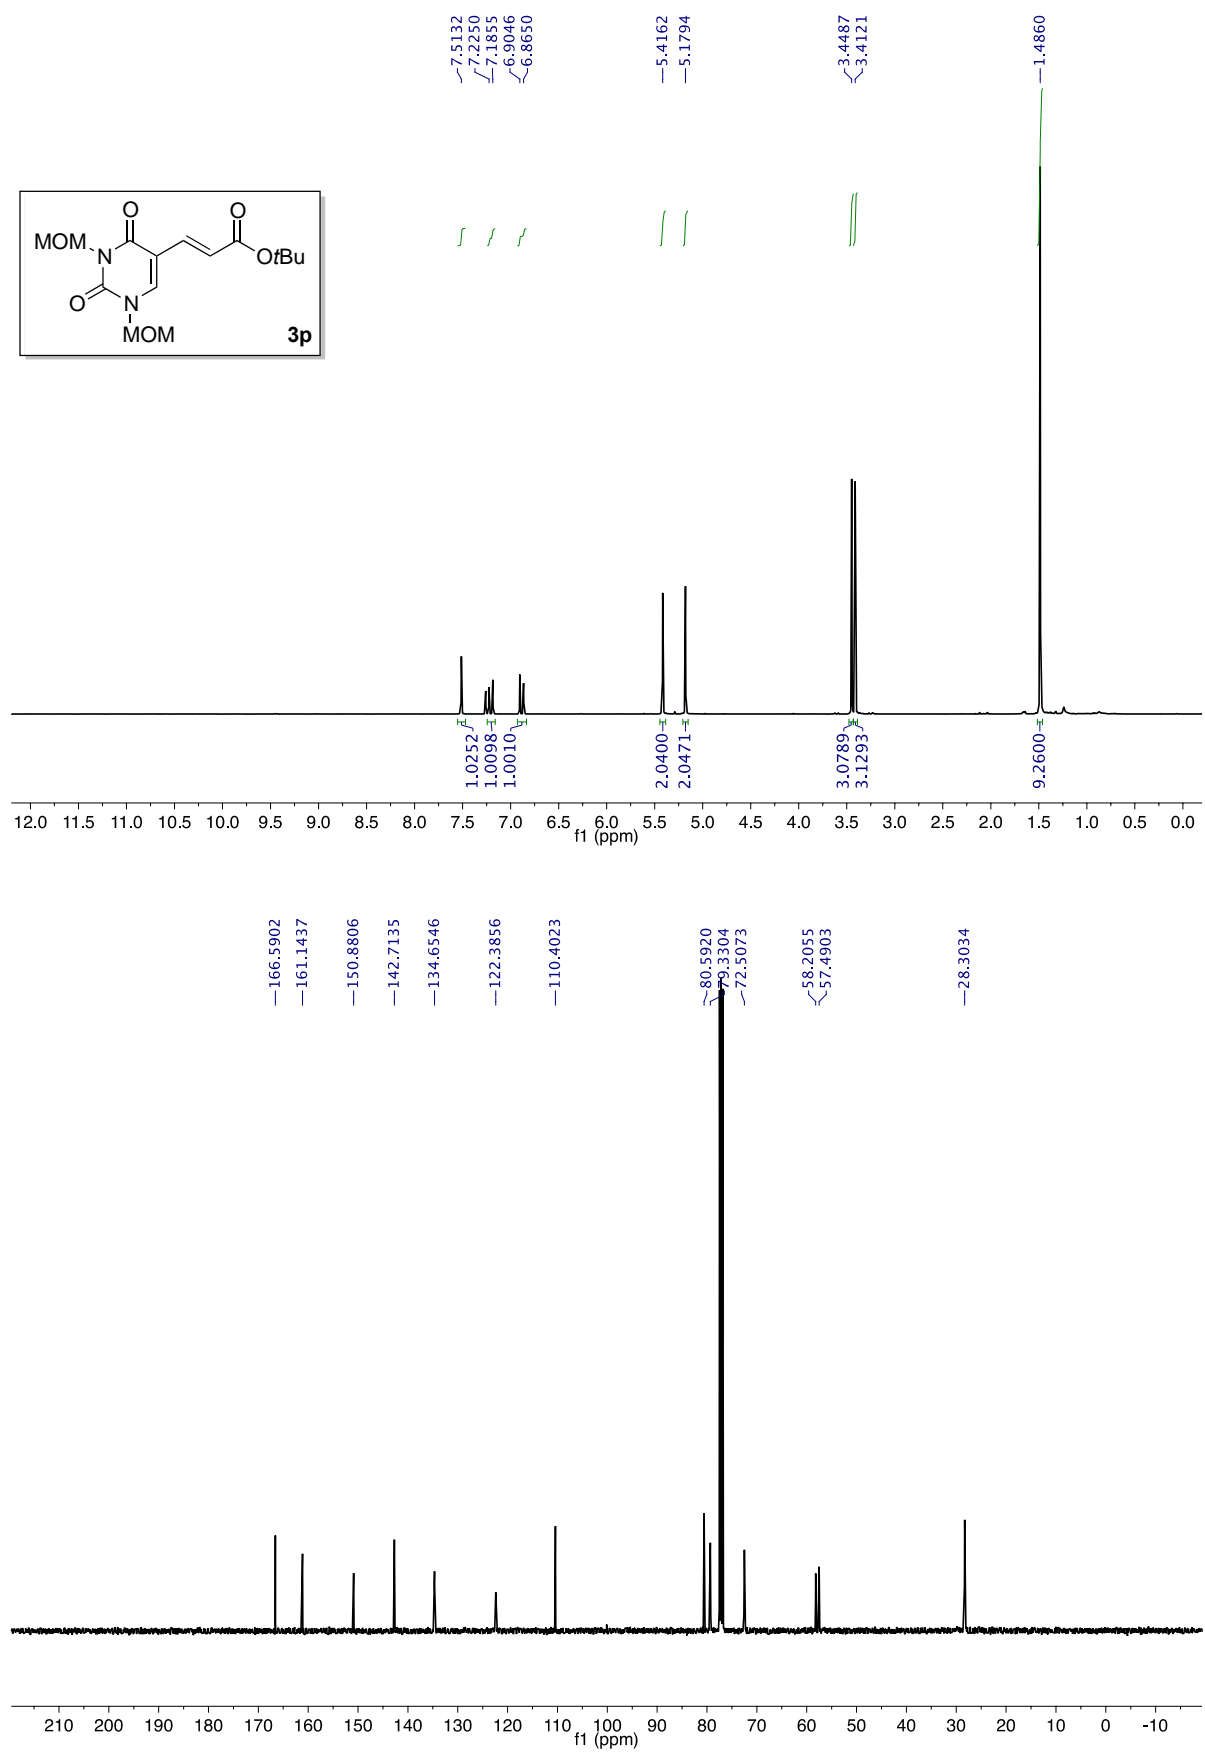

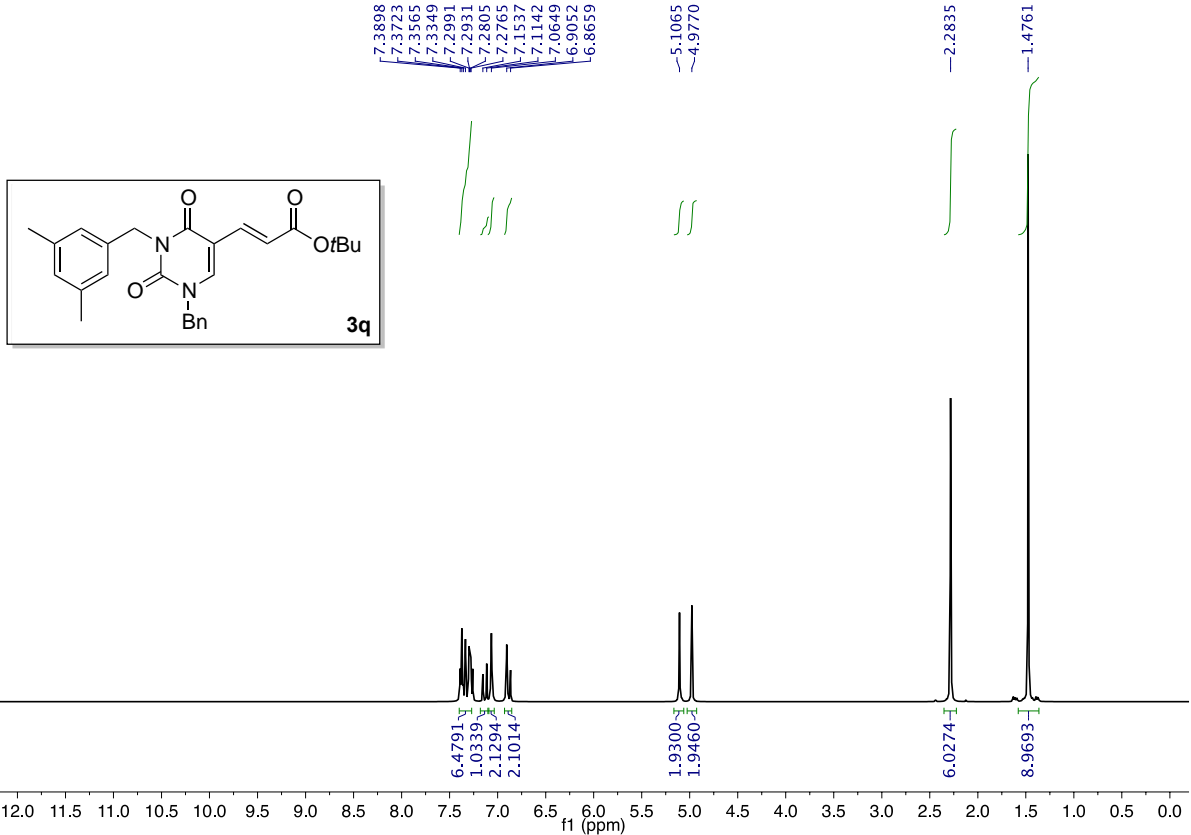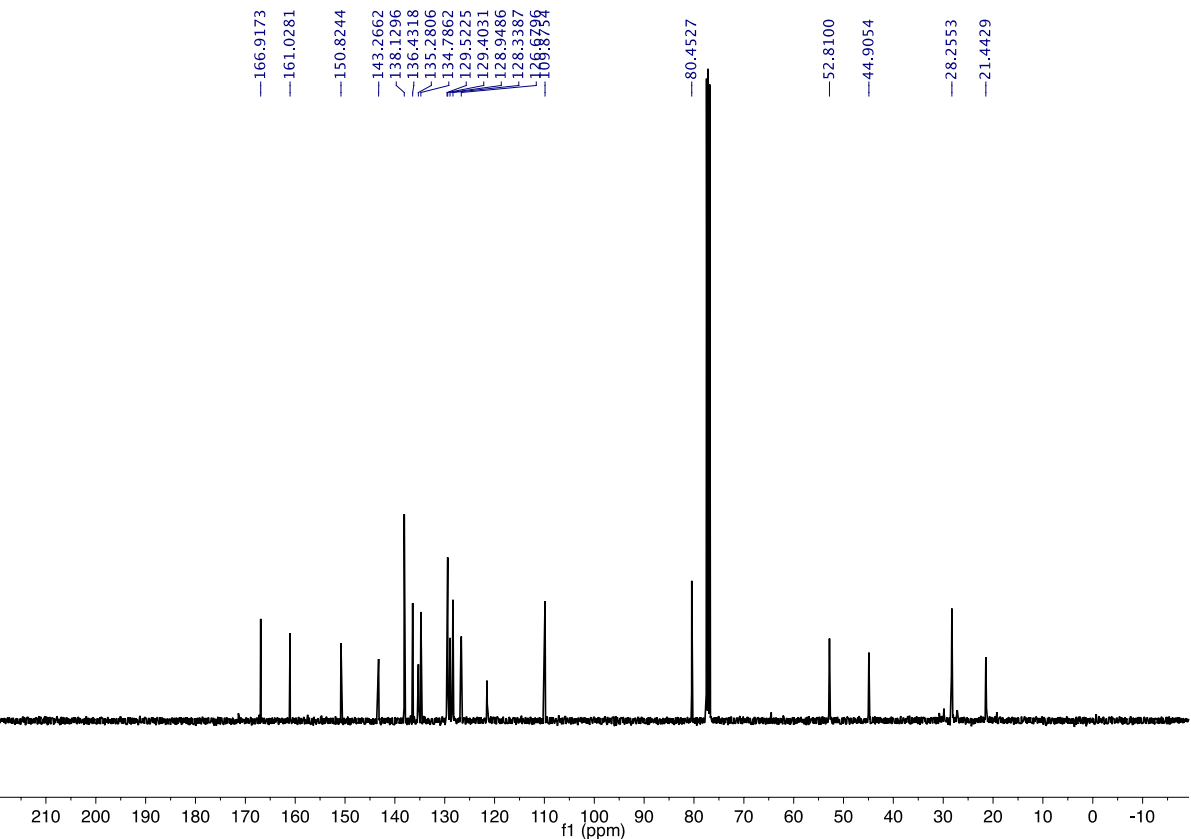



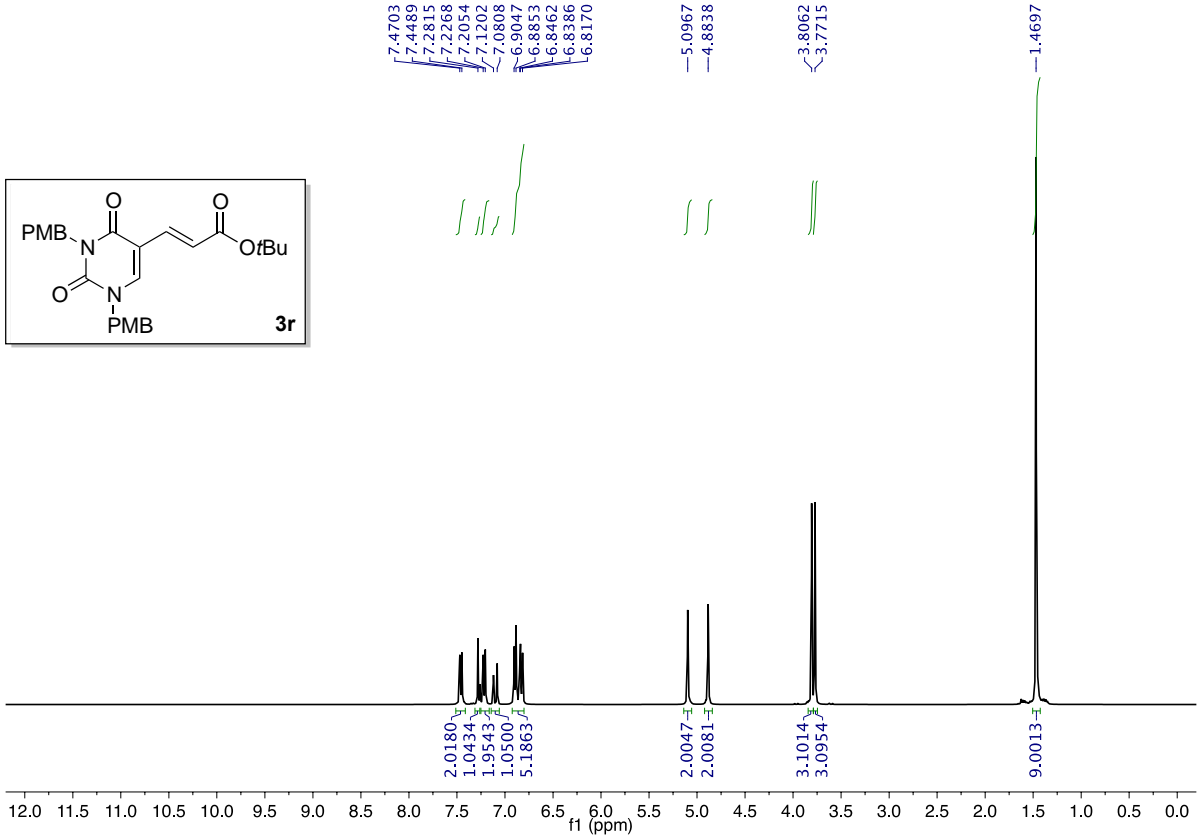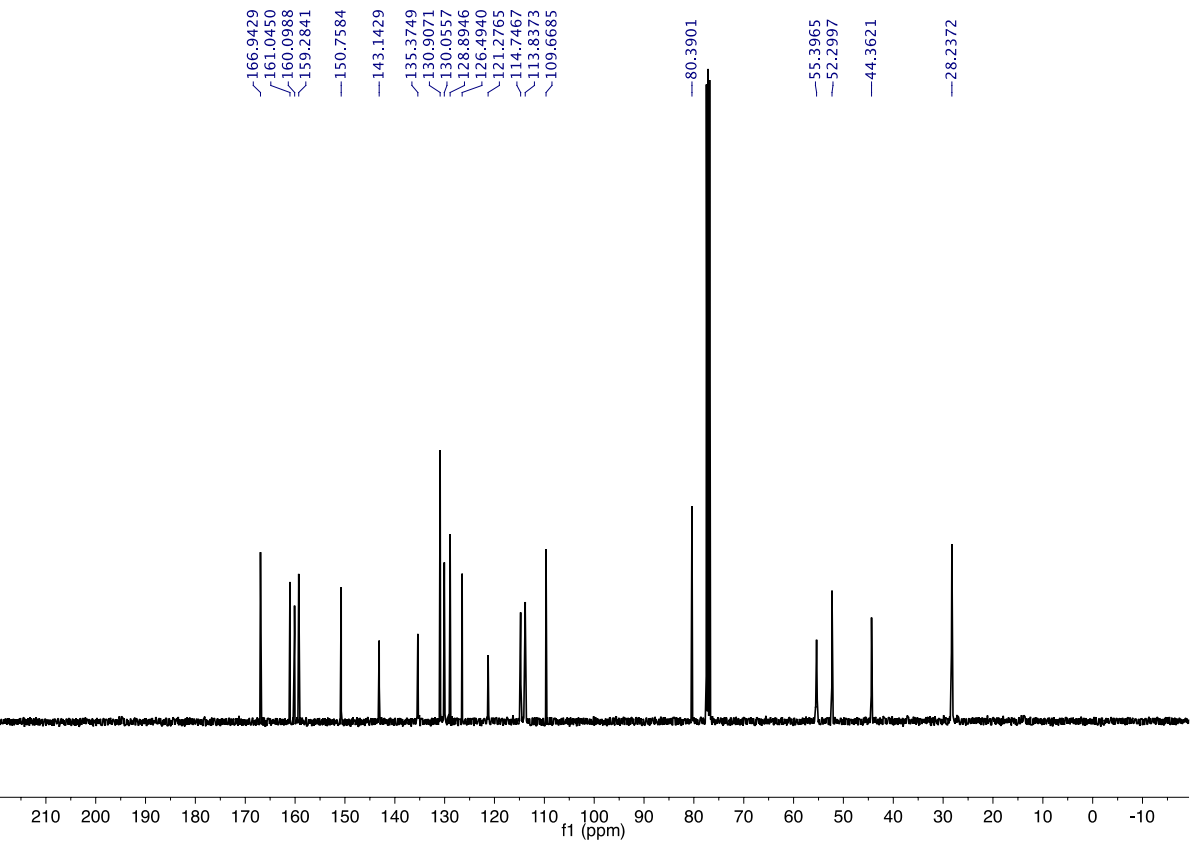

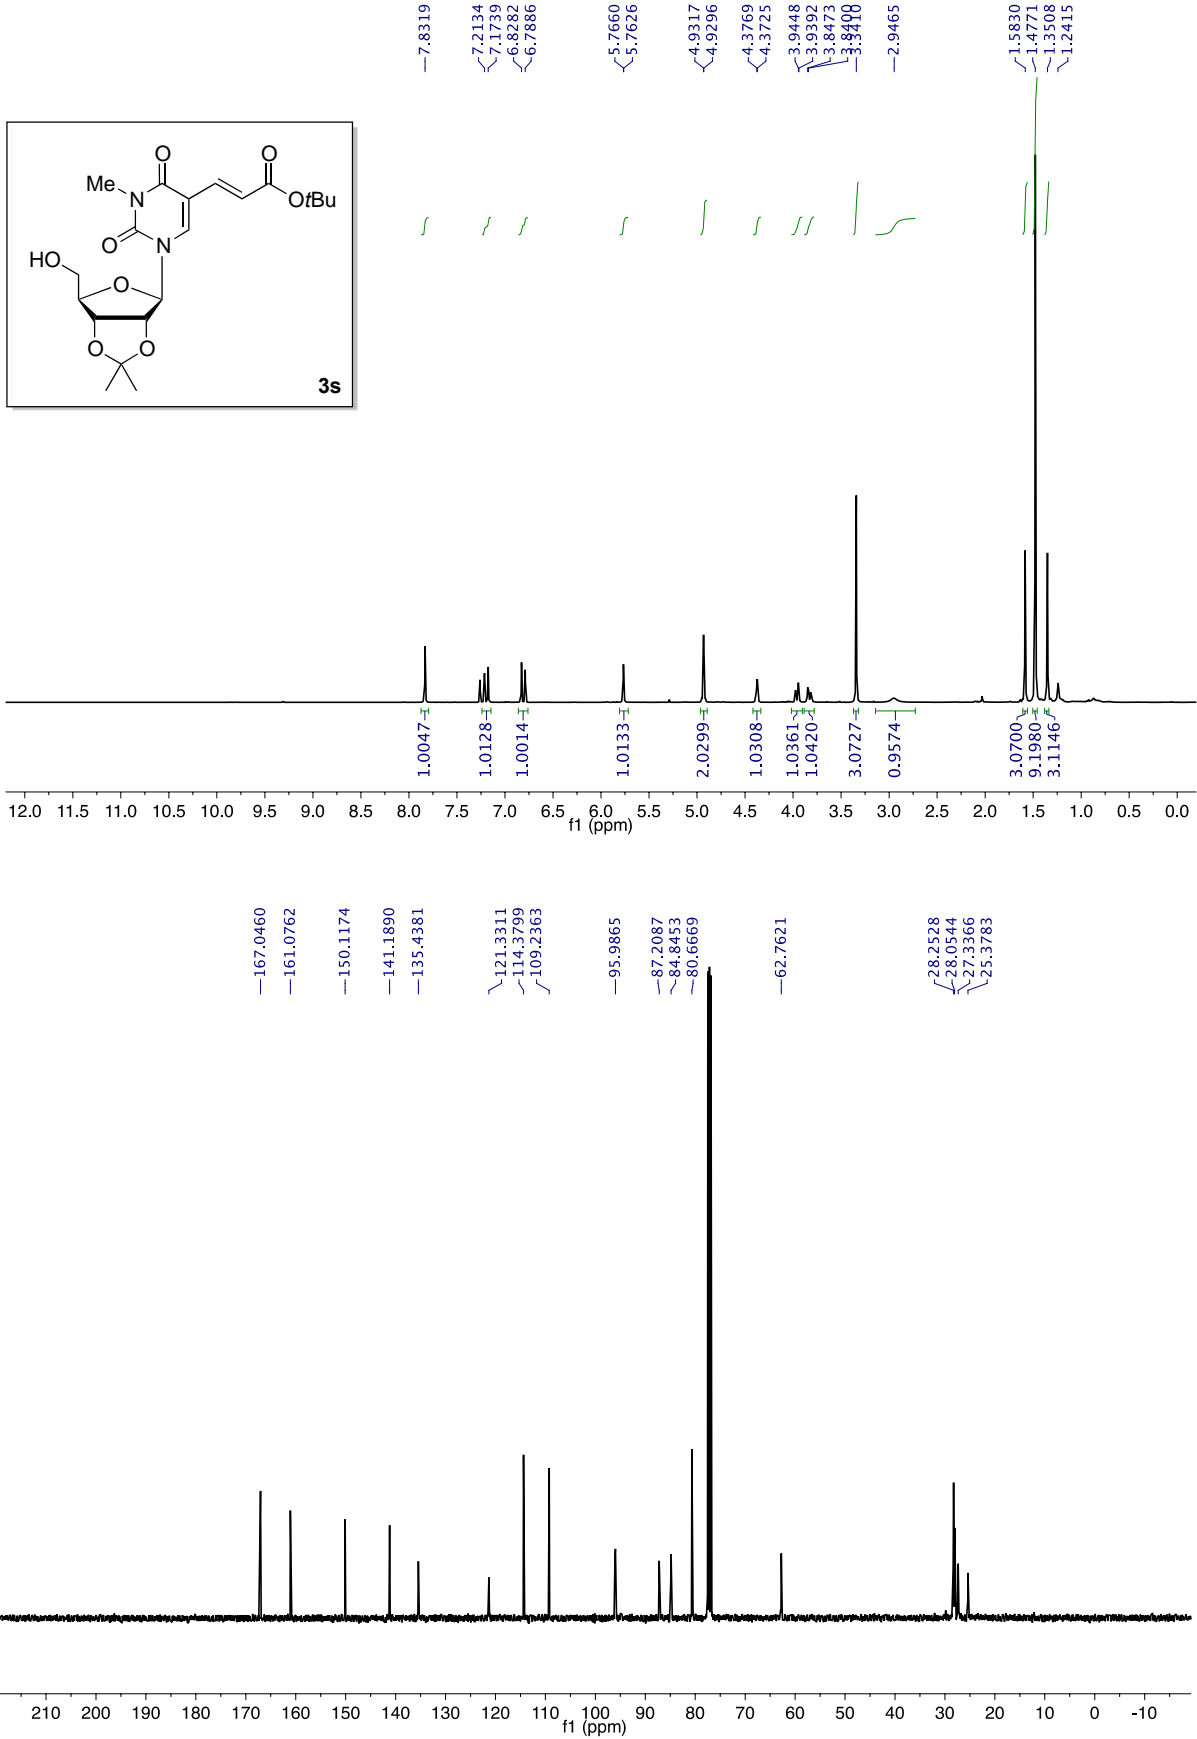

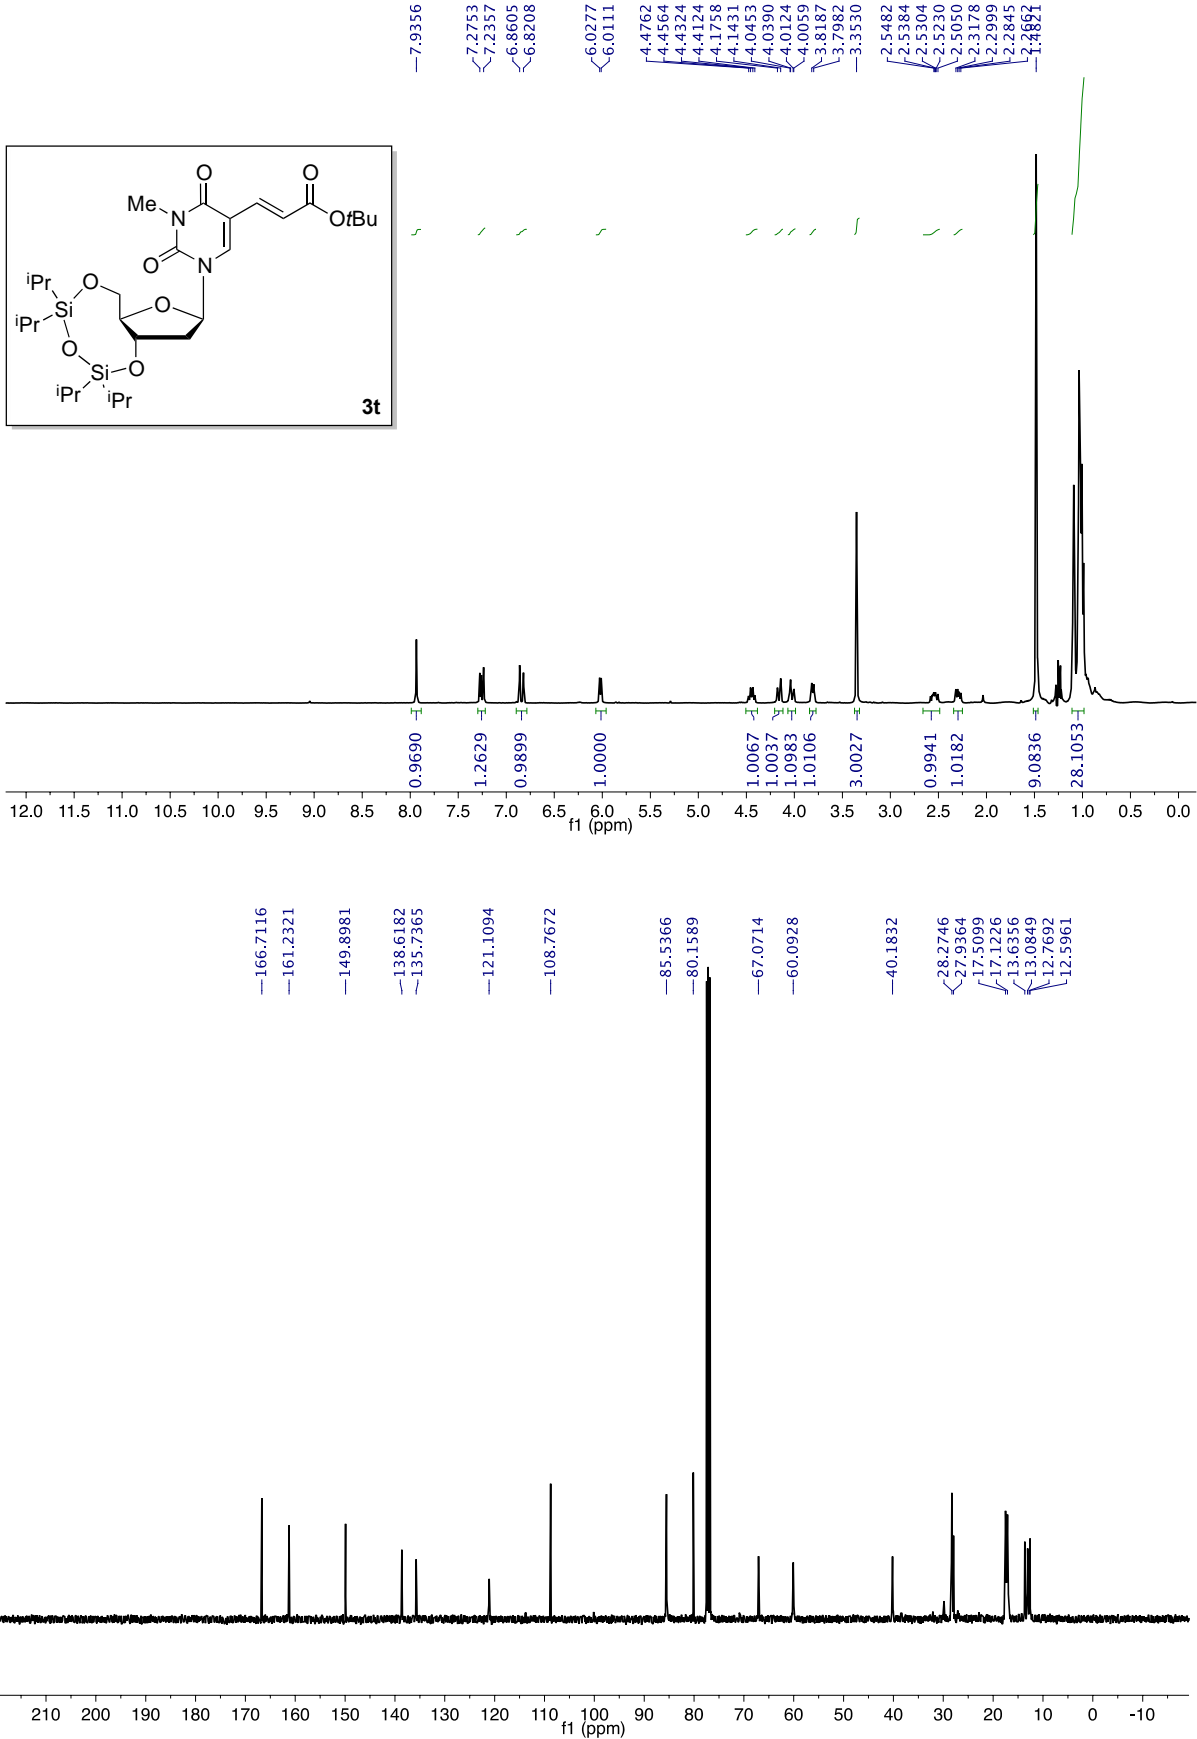

Supplement: c3cc41130c.pdf [file c3cc41130c.pdf]
